# 1 Criticality supports cross-frequency 2 cortical-thalamic information 3 transfer during conscious states

4 Daniel Toker<sup>1,2</sup>, Eli Müller<sup>3</sup>, Hiroyuki Miyamoto<sup>4,5,6</sup>, Maurizio S. Riga<sup>7</sup>, Laia  
5 Lladó-Pelfort<sup>8</sup>, Kazuhiro Yamakawa<sup>4,9</sup>, Francesc Artigas<sup>10,11,12</sup>, James M. Shine<sup>3</sup>,  
6 Andrew E. Hudson<sup>13,14</sup>, Nader Pouratian<sup>15\*</sup>, Martin M. Monti<sup>2,16\*</sup>

\*For correspondence:

[danieltokerg@ucla.edu](mailto:danieltokerg@ucla.edu) (DT)

7 <sup>1</sup>Department of Neurology, University of California, Los Angeles, CA, USA; <sup>2</sup>Department  
8 of Psychology, University of California, Los Angeles, CA, USA; <sup>3</sup>Brain and Mind Centre,  
9 The University of Sydney, Sydney, NSW, Australia; <sup>4</sup>Laboratory for Neurogenetics, RIKEN  
10 Center for Brain Science, Wako, Saitama 351-0198, Japan; <sup>5</sup>PRESTO, Japan Science and  
11 Technology Agency, Saitama 332-0012, Japan; <sup>6</sup>International Research Center for  
12 Neurointelligence (IRCN), The University of Tokyo Institutes for Advanced Study, Tokyo  
13 113-0033, Japan; <sup>7</sup>Andalusian Center for Molecular Biology and Regenerative Medicine  
14 (CABIMER-CSIC), 41092 Seville, Spain.; <sup>8</sup>Departament de Ciències Bàsiques. Facultat de  
15 Ciències de la Salut de Manresa. Universitat de Vic-Universitat Central de Catalunya  
16 (UVic-UCC), Barcelona, Spain; <sup>9</sup>Department of Neurodevelopmental Disorder Genetics,  
17 Institute of Brain Science, Nagoya City University Graduate School of Medical Science,  
18 Nagoya, Aichi 467-8601, Japan; <sup>10</sup>Departament de Neurociències i Terapèutica  
19 Experimental, CSIC-Institut d'Investigacions Biomèdiques de Barcelona, Barcelona,  
20 Spain; <sup>11</sup>Institut d'Investigacions Biomèdiques August Pi i Sunyer (IDIBAPS), Barcelona,  
21 Spain; <sup>12</sup>Centro de Investigación Biomédica en Red de Salud Mental (CIBERSAM),  
22 Instituto de Salud Carlos III, Madrid, Spain; <sup>13</sup>Department of Anesthesiology, Veterans  
23 Affairs Greater Los Angeles Healthcare System, Los Angeles, CA, USA; <sup>14</sup>Department of  
24 Anesthesiology and Perioperative Medicine, University of California, Los Angeles, Los  
25 Angeles, CA, USA; <sup>15</sup>Department of Neurological Surgery, UT Southwestern Medical  
26 Center, Dallas, Texas, USA; <sup>16</sup> Department of Neurosurgery, University of California Los  
27 Angeles, Los Angeles, California, USA; \* co-senior authors

28

29 **Abstract** Consciousness is thought to be regulated by bidirectional information transfer  
30 between the cortex and thalamus, but the nature of this bidirectional communication - and its  
31 possible disruption in unconsciousness - remains poorly understood. Here, we present two main  
32 findings elucidating mechanisms of corticothalamic information transfer during conscious states.  
33 First, we identify a highly preserved spectral channel of cortical-thalamic communication which is  
34 present during conscious states but which is diminished during the loss of consciousness and  
35 enhanced during psychedelic states. Specifically, we show that in humans, mice, and rats,  
36 information sent from either the cortex or thalamus via  $\delta/\theta/\alpha$  waves (~1.5-13 Hz) is consistently  
37 encoded by the other brain region by high  $\gamma$  waves (~50-100 Hz); moreover, unconsciousness  
38 induced by propofol anesthesia or generalized spike-and-wave seizures diminishes this  
39 cross-frequency communication, whereas the psychedelic 5-methoxy-*N,N*-dimethyltryptamine  
40 (5-MeO-DMT) enhances this interregional communication. Second, we leverage numerical

41 simulations and neural electrophysiology recordings from the thalamus and cortex of human  
42 patients, rats, and mice to show that these changes in cross-frequency cortical-thalamic  
43 information transfer are mediated by excursions of low-frequency thalamocortical  
44 electrodynamics toward/away from edge-of-chaos criticality, or the phase transition from stability  
45 to chaos. Overall, our findings link thalamic-cortical communication to consciousness, and  
46 further offer a novel, mathematically well-defined framework to explain the disruption to  
47 thalamic-cortical information transfer during unconscious states.

48

---

## 49 Introduction

50 Mounting evidence suggests that the maintenance of cortical information processing during con-  
51 scious states requires preserved communication between the cortex and several key subcortical  
52 structures (*Koch et al., 2016*). Among the subcortical structures that have been implicated in large-  
53 scale neural information processing during normal waking states, the thalamus stands out as per-  
54 haps the most important (*Shine, 2021*). This is most clearly suggested by its anatomy: the first-order  
55 nuclei of thalamus are the major anatomical bridges across which sensory information is trans-  
56 ferred from peripheral sources to the cortex, and the presence of extensive connections between  
57 higher-order thalamic nuclei and diverse cortical regions suggests that these nuclei are among the  
58 key bridges through which information is transferred from one part of the cortex to another (*Sher-*  
59 *man, 2007, 2016; Shine, 2021*) - a hypothesis which has found support from diverse neuroimaging  
60 studies (*Saalman et al., 2012; Theyel et al., 2010; Hwang et al., 2017; Müller et al., 2020*). It is  
61 therefore unsurprising that unconsciousness, which consistently coincides with reduced cortical  
62 information flow (*Imas et al., 2005; Toker et al., 2022; Sanjari et al., 2021; Schroeder et al., 2016;*  
63 *Hudetz et al., 2020; Ku et al., 2011; Lee et al., 2013; Mäki-Marttunen et al., 2013; Chen et al., 2020*),  
64 also appears to consistently coincide with disrupted communication between the cortex and tha-  
65 lamus (*Zheng et al., 2017; White and Alkire, 2003; Malekmohammadi et al., 2019; Redinbaugh*  
66 *et al., 2020; Bastos et al., 2021; Afrasiabi et al., 2021*). Identifying the mechanisms supporting  
67 cortical-thalamic communication, and how this communication may be disrupted during uncon-  
68 scious states, is therefore crucial both to our basic understanding of large-scale neural information  
69 processing, as well as our clinical grasp on conditions in which cortical-subcortical communication  
70 appears to be disrupted, such as in coma and vegetative states (*Monti et al., 2010*).

71 One unexplored mechanism which may support bidirectional communication between the cor-  
72 tex and thalamus during conscious states is criticality. Criticality, or a critical point, refers to the  
73 transition between different phases of a system, such as different phases of matter (e.g. solid  
74 versus liquid) or different phases of temporal dynamics (e.g. asynchronous versus synchronous  
75 dynamics, or laminar versus turbulent airflow). It is by now well-established that critical and near-  
76 critical systems tend to have a high capacity for transmitting and encoding information (*Langton,*  
77 *1990; Crutchfield and Young, 1988; Boedecker et al., 2012; Bertschinger and Natschläger, 2004*). It  
78 is thus unsurprising that a diverse array of analytical tools, applied to a diverse array of neurophys-  
79 iological data recorded from a diverse array of brain states, overwhelmingly support the hypothe-  
80 sis that the dynamics of the waking, healthy brain operate near one or several such critical points  
81 (*O'Byrne and Jerbi, 2022*). In line with this broad evidence of neural criticality during waking states,  
82 our recent work (*Toker et al., 2022*) showed that slow cortical electrodynamics during conscious  
83 states specifically operate near a phase transition known as the edge-of-chaos critical point, or the  
84 transition between periodicity and chaos, and that this form of criticality supports the information-  
85 richness of waking cortical electrodynamics. We also showed that slow cortical electrodynamics  
86 transition away from this critical point during anesthesia, generalized seizures, and coma, which  
87 diminishes the information-richness of cortical activity, and transitions closer to this critical point  
88 following the administration of the serotonergic hallucinogen lysergic acid diethylamide, which  
89 enhances the information-richness of cortical activity (*Toker et al., 2022*). These results accord

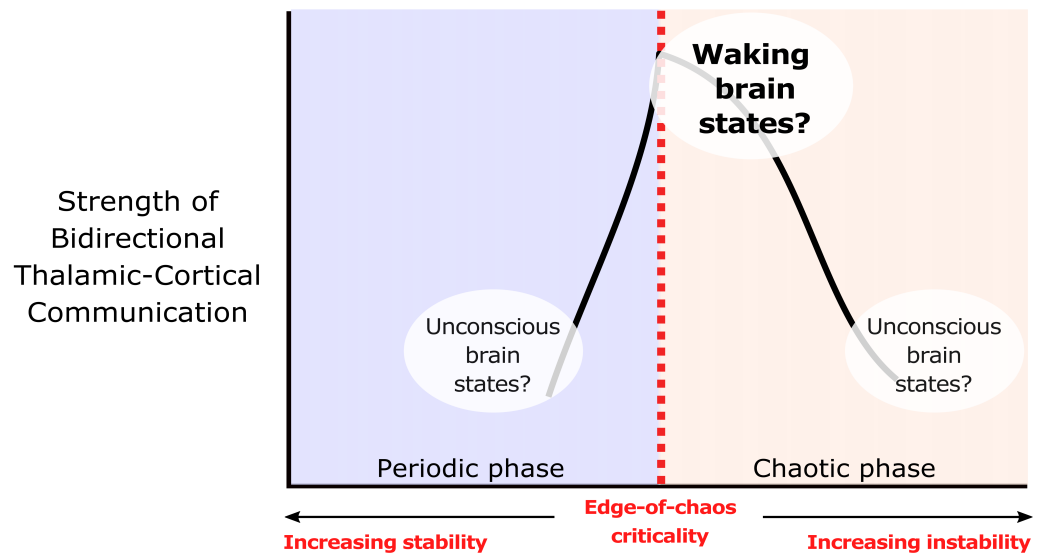

**Figure 1.** We hypothesize that the strength of bidirectional information transfer between the cortex and thalamus should be highest during waking brain states, owing to the proximity of slow neural electrodynamics to edge-of-chaos criticality during these states. We also predict that as slow neural electrodynamics transition away from this critical point during unconscious states, either into the chaotic phase or into the periodic phase, the strength of cortical-thalamic information transfer should be diminished. Adapted from (Toker *et al.*, 2022).

90 with the broad empirical evidence suggesting that cortical activity transitions away from criticality  
91 during unconscious states and transition closer to criticality during psychedelic states (Zimmern,  
92 2020). Therefore, it is straightforward to predict that the proximity of slow neural electrodynamics  
93 to the edge-of-chaos critical point might similarly modulate the strength of bidirectional commu-  
94 nication between the cortex and thalamus during normal waking states, unconscious states, and  
95 psychedelic states (Fig. 1).

96 Here, in order to better characterize the mechanisms of cortical-thalamic communication and  
97 how those mechanisms might be modulated by the proximity of neural electrodynamics to edge-  
98 of-chaos criticality, we first applied a novel information-theoretic measure of spectrally resolved  
99 information transfer to concurrent thalamic and cortical electric field recordings across species, in-  
100 cluding human essential tremor (ET) patients, Long-Evans rats, Genetic Absence Epilepsy Rats from  
101 Strasbourg (GAERS rats), and c57/bl6 mice. We identified a highly preserved pattern of low-to-high  
102 frequency bidirectional cortical-thalamic information transfer present across nearly all patients  
103 and animals during conscious states. Specifically, we found that information transmitted at low  
104 frequencies (1.625-13 Hz) from one brain structure is consistently encoded by the other brain struc-  
105 ture at high frequencies (~50-100 Hz). We also present evidence that this cross-frequency cortical-  
106 thalamic information transfer is disrupted during unconsciousness induced by both  $\gamma$ -Aminobutyric  
107 acid mediated (GABAergic) anesthetics and generalized spike-and-wave seizures, and enhanced by  
108 the serotonergic hallucinogen 5-methoxy-*N,N*-dimethyltryptamine, or 5-MeO-DMT, a potent dual  
109 agonist of 5-HT<sub>1A</sub> and 5-HT<sub>2A</sub> receptors. Finally, drawing both on our analysis of our electrophysiol-  
110 ogy recordings and on numerical simulations using a novel mean-field model of the basal ganglia-  
111 thalamo-cortical system, we found that the strength of this cross-frequency cortical-thalamic infor-  
112 mation transfer across brain states is likely mediated by transitions of low-frequency thalamocorti-  
113 cal electrodynamics toward or away from edge-of-chaos criticality, as predicted. To our knowledge,  
114 this work is the first to show that this precise form of criticality supports interregional communi-  
115 cation in the brain.

## 116 Results

### 117 **Low-to-high-frequency information transfer between the thalamus and cortex is** 118 **highly preserved across humans, rats, and mice in waking states**

119 Because long-range neural communication is likely frequency-multiplexed, with distinct long-range  
120 information streams encoded by distinct (and interacting) frequencies of oscillatory neural electro-  
121 dynamics (*Akam and Kullmann, 2014; Panzeri et al., 2010; Chao et al., 2018; Fontolan et al., 2014;*  
122 *Malekmohammadi et al., 2015*), we first evaluated patterns of thalamic-cortical communication  
123 during conscious states using a recently developed, spectrally resolved measure of directed infor-  
124 mation transfer which is both model-free and sensitive to delayed interactions (*Pinzuti et al., 2020*).  
125 The measure evaluates the strength and significance of frequency-specific information transfer us-  
126 ing surrogate time-series, which enable the estimation of how many bits of transfer entropy are lost  
127 when dynamics only within certain frequency ranges are randomized (see Methods). We applied  
128 this spectral information transfer measure to neural extracellular electric fields recorded simulta-  
129 neously from the ventral intermediate (Vim) thalamic nucleus and ipsilateral sensorimotor cortex  
130 of human essential (ET) patients; the ventral posterior thalamic nucleus and ipsilateral somatosen-  
131 sory cortex of Long-Evans rats; the mediodorsal thalamic nucleus and the medial prefrontal cortex  
132 of C57/BL6 mice; and the ventral posterior thalamic nucleus and contralateral somatosensory cor-  
133 tex of GAERS rats. Note that with the exception of the recording locations in the GAERS rats, all of  
134 these thalamic nuclei share direct reciprocal anatomical connections with the cortical areas from  
135 which signals were simultaneously recorded. Although the recording sites in the GAERS rats are  
136 not directly connected, the ventral posterior thalamic nucleus communicates indirectly with the  
137 contralateral somatosensory cortex via its reciprocal connectivity with the ipsilateral somatosen-  
138 sory cortex, which directly projects to the contralateral somatosensory cortex (*Petreanu et al., 2007;*  
139 *Wise and Jones, 1976; Olavarria et al., 1984*).

140 After an initial exploratory sweep of all possible spectral patterns of information transfer be-  
141 tween the cortex and thalamus across all patients/animals, channels, and recording windows,  
142 which did not use sufficient surrogate time-series data to evaluate statistical significance of infor-  
143 mation transfer across any given pair of frequency bands (owing to the prohibitive computational  
144 cost of doing so for all possible spectral patterns of information transfer) (Fig. 2), we identified  
145 a possible spectral channel of cortical-thalamic communication present across all species and ge-  
146 netic strains during conscious states: namely, information sent from either the cortex or thalamus  
147 in the low-frequency range (1.625-13 Hz) seemed to be consistently encoded by the other brain  
148 region in the high  $\gamma$  range (52-104 Hz) (note that these exact frequency ranges are determined  
149 by successive halves of the sampling frequency, as this method is based on wavelet decomposition  
150 - see Methods). To confirm this finding, we re-ran this spectral information transfer analysis along  
151 just these frequency bands, but using sufficient surrogates (100) to evaluate statistical significance,  
152 and found that there was indeed significant low-to-high frequency bidirectional cortical-thalamic  
153 information transfer across nearly all subjects during conscious states (Table 1).

### 154 **Bidirectional cross-frequency cortical-thalamic information transfer is disrupted** 155 **in unconsciousness and enhanced during psychedelic states**

156 To test whether this low-to-high frequency cortical-thalamic communication is disrupted during  
157 unconscious states and enhanced during psychedelic states (see Introduction), we calculated the  
158 strength of low-to-high-frequency bidirectional information transfer following intravenous ad-  
159 ministration of propofol anesthesia in human ET patients (varying doses - see Methods) and Long-  
160 Evans rats (plasma propofol concentration of 12  $\mu\text{g/ml}$ ); during spontaneous generalized spike-  
161 and-wave seizures in GAERS rats; and following subcutaneous injection of saline + 5-MeO-DMT (5  
162 mg/kg) in C57/BL6 mice. As predicted, we found that cross-frequency information transfer from the  
163 cortex to the thalamus was disrupted during unconscious states and enhanced during psychedelic  
164 states. Specifically, propofol diminished low-frequency to high-frequency information transfer

**Table 1.** Following our initial exploratory sweep of all possible spectral patterns of cortical-thalamic communication (Fig. 2), we used surrogate testing to evaluate whether there was significant information transfer from slow (1.625-13 Hz) to fast (52-104 Hz) electrodynamics between anatomically connected sub-regions of the thalamus and cortex (see Methods). For each 10-second window of activity, surrogate testing produced a single p-value reflecting the significance of cross-frequency information transfer in each direction (cortico-thalamic and thalamo-cortical). Overall statistical significance, across 10-second windows within each subject, was assessed by evaluating the harmonic mean  $\hat{p}$  (Wilson, 2019) of all single-trial p-values. In line with our initial exploratory sweep (Fig. 2), we found that there was significant low-to-high frequency bidirectional information transfer between the thalamus and cortex in nearly every species, strain, and subject.

|                     | Cortex to Thalamus | Thalamus to Cortex |
|---------------------|--------------------|--------------------|
| Human ET Patient 1  | $\hat{p}=0.0371$   | $\hat{p}=0.0099$   |
| Human ET Patient 2  | $\hat{p}=0.0099$   | $\hat{p}=0.0099$   |
| Human ET Patient 3  | $\hat{p}=0.0152$   | $\hat{p}=0.0099$   |
| Human ET Patient 4  | $\hat{p}=0.0099$   | $\hat{p}=0.0099$   |
| Human ET Patient 5  | $\hat{p}=0.0099$   | $\hat{p}=0.0099$   |
| Human ET Patient 6  | $\hat{p}=0.0099$   | $\hat{p}=0.0099$   |
| Human ET Patient 7  | $\hat{p}=0.0099$   | $\hat{p}=0.0099$   |
| Human ET Patient 8  | $\hat{p}=0.0099$   | $\hat{p}=0.0099$   |
| Human ET Patient 9  | $\hat{p}=0.0099$   | $\hat{p}=0.0099$   |
| Human ET Patient 10 | $\hat{p}=0.0099$   | $\hat{p}=0.0099$   |
| Long-Evans Rat 1    | $\hat{p}=0.0542$   | $\hat{p}=0.0179$   |
| Long-Evans Rat 2    | $\hat{p}=0.0278$   | $\hat{p}=0.0328$   |
| Long-Evans Rat 3    | $\hat{p}=0.024$    | $\hat{p}=0.0338$   |
| Long-Evans Rat 4    | $\hat{p}=0.0375$   | $\hat{p}=0.0396$   |
| Long-Evans Rat 5    | $\hat{p}=0.0257$   | $\hat{p}=0.0338$   |
| Long-Evans Rat 6    | $\hat{p}=0.0407$   | $\hat{p}=0.0318$   |
| Long-Evans Rat 7    | $\hat{p}=0.0234$   | $\hat{p}=0.0316$   |
| Long-Evans Rat 8    | $\hat{p}=0.0225$   | $\hat{p}=0.0151$   |
| Long-Evans Rat 9    | $\hat{p}=0.0792$   | $\hat{p}=0.1683$   |
| GAERS Rat 1         | $\hat{p}=0.031$    | $\hat{p}=0.0238$   |
| GAERS Rat 2         | $\hat{p}=0.0349$   | $\hat{p}=0.0207$   |
| GAERS Rat 3         | $\hat{p}=0.0352$   | $\hat{p}=0.0237$   |
| GAERS Rat 4         | $\hat{p}=0.0313$   | $\hat{p}=0.0274$   |
| GAERS Rat 5         | $\hat{p}=0.0364$   | $\hat{p}=0.0319$   |
| GAERS Rat 6         | $\hat{p}=0.0526$   | $\hat{p}=0.0309$   |
| GAERS Rat 7         | $\hat{p}=0.0304$   | $\hat{p}=0.0266$   |
| C57/BL6 Mouse 1     | $\hat{p}=0.0265$   | $\hat{p}=0.023$    |
| C57/BL6 Mouse 2     | $\hat{p}=0.0262$   | $\hat{p}=0.0217$   |
| C57/BL6 Mouse 3     | $\hat{p}=0.0281$   | $\hat{p}=0.0214$   |
| C57/BL6 Mouse 4     | $\hat{p}=0.0461$   | $\hat{p}=0.0357$   |
| C57/BL6 Mouse 5     | $\hat{p}=0.0356$   | $\hat{p}=0.0303$   |

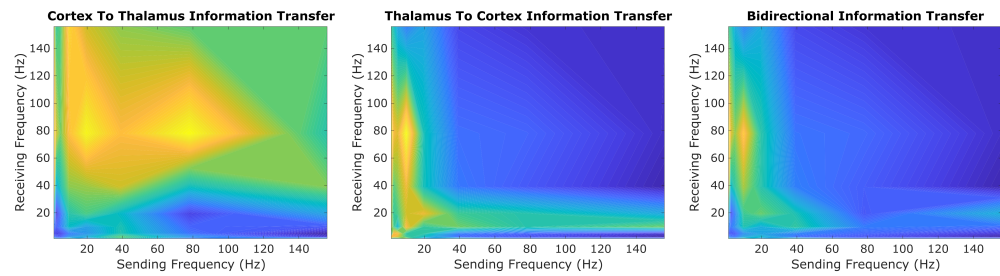

**Figure 2.** In our initial exploratory sweep of spectral patterns of directed cortical-thalamic information transfer during conscious states, we identified a prominent motif of low-to-high frequency bidirectional communication that was present during waking states in nearly all subjects and species. We first estimated the (z-scored) strengths of information transfer across every possible pair of frequency bands, for every 10-second trial, and for every subject during waking states. We then took the average cross-trial result for every subject. Here, we plotted the mode across subjects' cross-trial averages in order to reveal the spectral patterns of information transfer that occurred most frequently across subjects during conscious states. For cortico-thalamic information transfer (left), we found that information sent from the cortex across all frequencies is frequently received by the thalamus in the high  $\gamma$  range. For thalamo-cortical information transfer (middle), we observed a prominent pattern of low-to-high frequency information transfer. When looking at the mode across all cross-trial averages of both cortico-thalamic and thalamo-cortical information transfer during conscious states (right), there seems to be a consistent channel of communication from the low-frequency range (1.625-13 Hz) to the high-frequency range (~50-100 Hz) in both directions (cortico-thalamic and thalamo-cortical). We therefore chose to study this cross-frequency pattern of information transfer in our subsequent analyses of waking, GABAergic anesthesia, generalized spike-and-wave seizure, and psychedelic states.

165 from the cortex to the thalamus in both human ET patients ( $p=0.002$ , one-tailed Wilcoxon signed-  
166 rank test comparing patients' cross-trial medians during waking states versus propofol states) (Fig.  
167 3A) and Long-Evans rats ( $p=0.002$ ) (Fig. 3B). Similarly, cross-frequency corticothalamic information  
168 transfer was reduced during generalized spike-and-wave seizures in GAERS rats ( $p=0.0078$ ) (Fig. 3C).  
169 Conversely, 5-MeO-DMT significantly increased the strength of low-to-high frequency corticothalam-  
170 ic information transfer in C57/BL6 mice ( $p=0.0312$ ) (Fig. 3D), despite the fact that this brain state,  
171 similar to anesthesia, is marked by reduced high-frequency activity and increased low-frequency  
172 activity in both thalamus and cortex (Fig. 4); this suggests that these observed changes to cross-  
173 frequency communication are independent of the spectral content of thalamocortical activity. The  
174 same overall pattern was seen with low-to-high frequency information transfer from the thalamus  
175 to the cortex. Specifically, we found that the strength cross-frequency communication from the  
176 thalamus to the cortex was significantly diminished during propofol anesthesia in both human  
177 ET patients ( $p=0.002$ ) (Fig. 5A) and Long-Evans rats ( $p=0.0098$ ) (Fig. 5B). Similarly, the strength of  
178 cross-frequency thalamocortical information transfer was significantly reduced in GAERS rats dur-  
179 ing generalized spike-and-wave seizures ( $p=0.0078$ ) (Fig. 5C), but did not change during psychedelic  
180 states in C57/BL6 mice ( $p=0.3125$ ) (Fig. 5D).

181 To confirm that the observed results reflect a breakdown in thalamic-cortical communication  
182 rather than changes in the spectral content of thalamocortical electrodynamics, we performed  
183 a permutation-based nonparametric analysis of covariance, which revealed significant variance  
184 across brain states in the strength of both cross-frequency cortico-thalamic ( $p=0.0001$ ) and thalamo-  
185 cortical ( $p=0.0007$ ) information transfer, which could not be explained by spectral changes at ei-  
186 ther low (1.625-13 Hz) or high (52-104 Hz) frequencies (Supplementary File 1). We also confirmed  
187 that these observed changes to cross-frequency communication were not driven by changes in  
188 non-spectrally resolved information transfer between the thalamus and cortex. Specifically, we  
189 found that (non-spectrally resolved) transfer entropy between these two brain regions did not vary  
190 consistently across different brain states, instead decreasing significantly during unconsciousness  
191 only in human ET patients, and increasing significantly during propofol anesthesia in Long-Evans  
192 Rats, generalized spike-and-wave seizures in GAERS rats, and psychedelic states in C57/BL6 mice

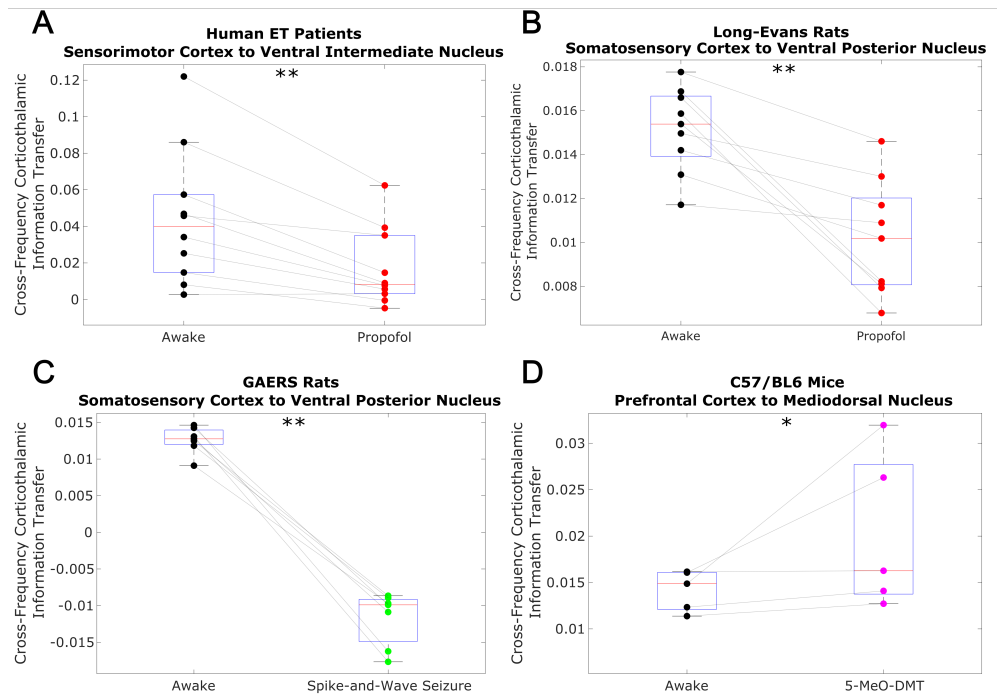

**Figure 3.** Using a spectrally resolved measure of directed information transfer (see Methods), we found that the strength of information transferred from cortical  $\delta/\theta/\alpha$  waves ( $\sim 1.5$ -13 Hz) to thalamic high  $\gamma$  waves ( $\sim 50$ -100 Hz) is significantly reduced during unconsciousness induced by propofol anesthesia (A-B) and generalized spike-and-wave seizures (C). Conversely, the strength of this low-to-high frequency corticothalamic information transfer is significantly increased during psychedelic states induced by 5-MeO-DMT (D). \*= $p < 0.05$ , \*\*= $p < 0.01$ , significance assessed using a one-tailed Wilcoxon signed-rank test.

193 from both cortex to thalamus (Figure 3-figure supplement 1) and thalamus to cortex (Figure 5-  
 194 figure supplement 1). We also found that the observed results were not driven by changes to the  
 195 strength of phase-amplitude coupling between these regions. Specifically, we found that coupling  
 196 between the phase of low-frequency (1.625-13 Hz) activity in one brain region and the amplitude  
 197 of high-frequency (52-104 Hz) activity in the other, as assessed using the Modulation Index (*Tort*  
 198 *et al., 2008*), increased during propofol anesthesia in Long-Evans Rats, generalized spike-and-wave  
 199 seizures in GAERS rats, and psychedelic states in C57/BL6 mice, with no change during propo-  
 200 fol anesthesia in human ET patients from both cortex to thalamus (Figure 3-figure supplement 2)  
 201 and thalamus to cortex (Figure 5-figure supplement 2). These results suggest that low-to-high fre-  
 202 quency cortical-thalamic information transfer is distinct from both conventional, non-spectral mea-  
 203 sures of directed information transfer, as well as from conventional measures of cross-frequency  
 204 coupling, which only take into account linear and same-time interactions. As such, the strength  
 205 of low-to-high frequency bidirectional cortical-thalamic information transfer is a specific and novel  
 206 hallmark of conscious brain states.

### 207 **Cross-frequency information transfer between the cortex and thalamus is supported** 208 **by edge-of-chaos criticality: mean-field modeling results**

209 Based on our prior work indicating that the brain's information processing capacity during con-  
 210 scious states is supported by the proximity of slow cortical dynamics to edge-of-chaos criticality  
 211 (*Toker et al., 2022*), we hypothesized that these changes in cross-frequency cortical-thalamic in-  
 212 formation transfer across brain states might be mediated by transitions of slow thalamocortical  
 213 electrodynamics away from or closer to the edge-of-chaos critical point, or the phase transition  
 214 from stable to chaotic dynamics. To test this hypothesis, we first developed a mean-field model of

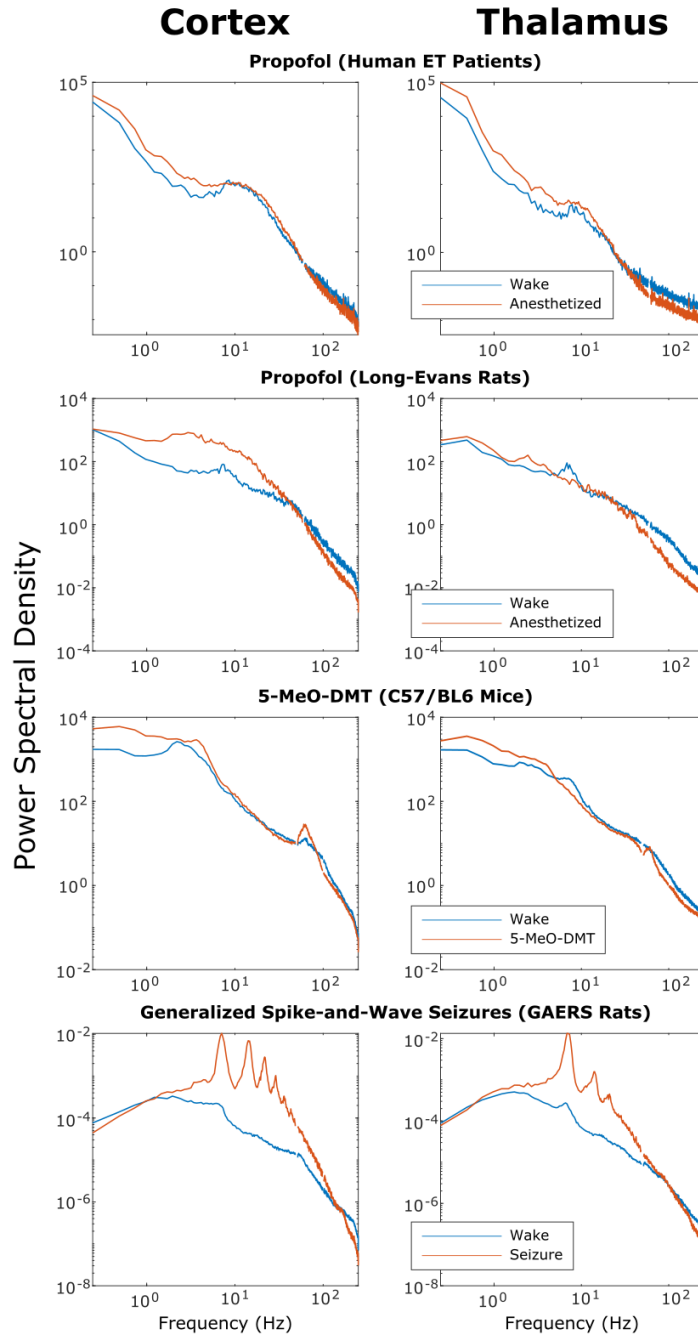

**Figure 4.** We here plot the cross-subject median power spectral densities (estimated using Welch's method) for all brain states. Note that both propofol and 5-MeO-DMT increased spectral power in the slow/delta range ( $\leq 4$  Hz) and decreased spectral power above 80 Hz in both cortex and thalamus, despite opposing effects on cross-frequency corticothalamic information transfer (Fig. 3).



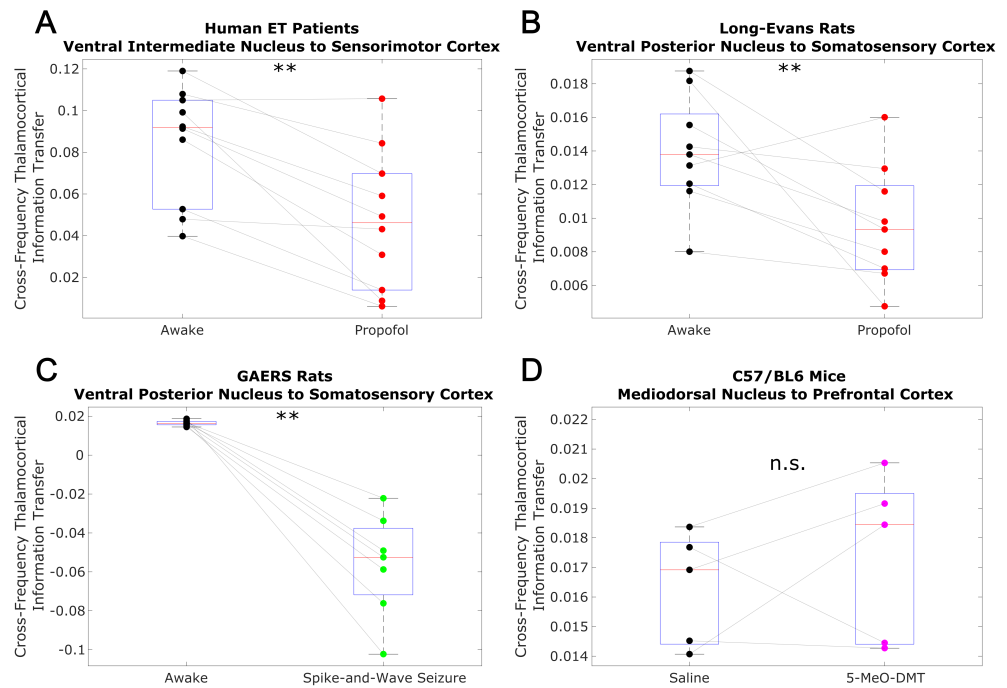

**Figure 5.** Similar to the results we observed for communication from the cortex to the thalamus (Fig. 3), we found that strength of information transferred from thalamic  $\delta/\theta/\alpha$  waves (~1.5-13 Hz) to cortical high  $\gamma$  waves (~50-100 Hz) is significantly reduced during unconsciousness induced by propofol anesthesia (A-B) and generalized spike-and-wave seizures (C). Unlike corticothalamic information transfer (Fig. 3), however, the strength of this low-to-high frequency information transfer from the thalamus to cortex does not change significantly during psychedelic states induced by 5-MeO-DMT (D). \*= $p < 0.05$ , \*\*= $p < 0.01$ , significance assessed using a one-tailed Wilcoxon signed-rank test.

215 the electrodynamics of the brain which could replicate these spectral patterns of cortical-thalamic  
216 information transfer observed in nearly all subjects/animals during waking states, and which could  
217 moreover replicate diverse, known features of neural electrodynamics. The reason we must first  
218 construct a mean-field model is because the presence and degree of chaos in any system can  
219 only be calculated with (some) certainty in a simulation, where noise and initial conditions can be  
220 precisely controlled in the estimation of the system's largest Lyapunov exponent (LLE) - a mathe-  
221 matically formal measure of chaoticity which quantifies how quickly initially similar system states  
222 diverge. It is for this reason that the study of chaos in biology should in general be paired with re-  
223 alistic simulations of the biological system of interest (*Glass and Mackey, 1988; Toker et al., 2020*).  
224 Accordingly, we used Bayesian-genetic optimization to tune the parameters of a mean-field model  
225 of the basal ganglia-thalamo-cortical system (Fig. 6) such that it generated biologically realistic  
226 large-scale neural electrodynamics across waking, anesthesia, and spike-and-wave seizure states  
227 (see Methods and Fig. 6-figure supplements 1-3 for details).

228 The resulting simulations exhibited a broad range of biologically realistic features (Fig. 7). First,  
229 our simulated cortical LFPs for the waking state exhibited spectral peaks at all canonical frequency  
230 bands, with the strongest peak in the  $\alpha$  (8-13 Hz) range (Fig. 7-figure supplement 1). Moreover,  
231 mean firing rates for each brain region in the model closely matched known region-specific firing  
232 rates in mammals (Supplementary File 2). Furthermore, as in the real brain (*Ray et al., 2008*), there  
233 was a significant, positive correlation between fluctuations in our model's cortical firing rate and  
234 fluctuations in the amplitude of high-frequency (60-200 Hz) simulated cortical LFP activity ( $r=0.175$ ,  
235  $p=1.1e-35$ ). Finally, recapitulating our novel empirical results (Table 1), our simulated cortical and  
236 thalamic LFPs exhibited significant, cross-frequency information transfer from thalamus to cortex  
237 (harmonic mean across 10 runs with different initial conditions  $\hat{p}=0.0112$ ) and from cortex to tha-  
238 lamus ( $\hat{p}=0.011$ ).

239 Beyond our simulation of the waking state, our anesthesia simulation likewise exhibited a broad  
240 range of biologically realistic features. First, in line with empirical results (Fig. 4), at a 100% anes-  
241 thetic "dose," our simulated cortical LFPs exhibited increased low-frequency power and decreased  
242 high-frequency power relative to the simulated LFPs corresponding to the waking state (Fig. 7-  
243 figure supplement 2). Moreover, increasing simulated "doses" of simulated anesthesia effect re-  
244 capitulated well-established dose-response trajectories of GABAergic anesthetics, including a con-  
245 tinual decline in cortical firing rates (*Bastos et al., 2021*) (Fig. 7-figure supplement 3A) and LFP  
246 information-richness (*Frohlich et al., 2021*) (Fig. 7-figure supplement 3B), a continual rise in the  
247 power of low-frequency activity (*Billard et al., 1997*) (Fig. 7-figure supplement 3C), and a transition  
248 to burst suppression followed by isoelectricity and cessation of firing at very high doses (*Ching  
249 and Brown, 2014*) (Fig. 7). Moreover, in line with both prior modeling (*Steyn-Ross et al., 2013*) and  
250 empirical (*Toker et al., 2022*) work, our simulated LFPs in the anesthesia state were more strongly  
251 chaotic than simulated cortical LFPs in the waking state (Fig. 7-figure supplement 3D). Furthermore,  
252 though these features were not explicitly selected for in our parameter optimization, our simulated  
253 anesthesia effect yielded several additional biologically realistic features, including the generation  
254 of LFPs with increasingly steep spectral slopes (*Colombo et al., 2019; Lendner et al., 2020*) (Fig. 7-  
255 figure supplement 3E), as well as prolonged inhibitory postsynaptic potentials (IPSPs) at excitatory  
256 cortical and thalamic relay cells relative to our waking simulation (*Kitamura et al., 2003; Hindriks  
257 and van Putten, 2012; Hutt and Longtin, 2010; Noroozbabae et al., 2021*) (Fig. 7-figure supplement  
258 4).

259 Finally, our generalized spike-and-wave seizure simulation likewise recapitulated several estab-  
260 lished biological features of seizures, including a large rise in cortical firing rates (Fig. 7-figure  
261 supplement 5A) (though cortical firing rates in our seizure simulation were considerably higher  
262 than in empirical data from GAERS rats (*Jarre et al., 2017*)) and a loss in the information-richness  
263 of cortical LFPs (*Mateos et al., 2018*) (Fig. 7-figure supplement 5B). In addition, following both prior  
264 empirical (*Toker et al., 2022*) and modeling (*Steyn-Ross et al., 2013; Breakspear et al., 2006*) results,  
265 our simulated LFPs in the seizure state were periodic, i.e., were insensitive to small perturbations

266 (Fig. 7-figure supplement 5C). Example traces of cortical LFPs from our simulations are plotted in  
267 Fig. 7. Parameters for the three simulated brain states are listed in Supplementary File 3.

268 With these sufficiently realistic simulations of large-scale neural electrodynamics in hand, we  
269 used our mean-field model to assess, *in silico*, the relationship between edge-of-chaos criticality  
270 and bidirectional, cross-frequency information transfer between the cortex and thalamic relay nu-  
271 clei. To do so, we generated LFPs at 50 increasing “doses” of simulated anesthetic effect and 50  
272 increasing strengths of seizure effect, relative to our normal waking simulation (see Methods). The  
273 resulting parameter sweep yielded simulated cortical LFPs with a wide range of LLEs, including sev-  
274 eral near-critical LFPs (i.e., simulated LFPs with an estimated LLE near zero, indicating neither expo-  
275 nential divergence nor convergence of initially similar system states). Consistent with our predic-  
276 tions, we found that there was a clear peak of bidirectional, cross-frequency information transfer  
277 between our simulated cortical and thalamic LFPs when our simulated thalamocortical electrody-  
278 namics were poised near the edge-of-chaos critical point (Fig. 8A-B). We found that bidirectional  
279 cross-frequency information transfer decayed as the (simulated) anesthetic effect was increased,  
280 which generated increasingly chaotic thalamocortical LFPs; likewise, cross-frequency information  
281 transfer decayed as the (simulated) seizure effect was increased, which generated increasingly  
282 periodic LFPs, as shown in Fig. 8A-B. Though these results offer compelling theoretical evidence  
283 for a relationship between edge-of-chaos criticality and the strength of cross-frequency informa-  
284 tion transfer between the thalamus and cortex, LLEs cannot be accurately estimated in empirical  
285 data, and therefore alternative chaos detection algorithms are required in order to empirically test  
286 this relationship between chaoticity and cross-frequency cortical-thalamic communication in real  
287 brains. Because the K-statistic of the modified 0-1 chaos test has previously been demonstrated to  
288 accurately estimate chaoticity from empirical time-series recordings (*Toker et al., 2020*), we tested  
289 whether the K-statistic could accurately track chaoticity in our mean-field simulation. Indeed, when  
290 applied to simulated thalamocortical LFPs bandpass filtered between 1.625-13 Hz (matching the  
291 slow frequencies of cortical-thalamic information transfer identified here), the K-statistic was sig-  
292 nificantly correlated with the estimated largest Lyapunov exponent of our simulated LFPs ( $\rho=0.74$ ,  
293  $p=0$ ), and could moreover recapitulate the observed relationship between thalamocortical chaotic-  
294 ity and cross-frequency cortical-thalamic information transfer in our mean-field model, as shown  
295 in Fig. 8C-D. This indicates that the K-statistic of the modified 0-1 chaos test can be used to test  
296 the predicted relationship between proximity to edge-of-chaos criticality and the strength of cross-  
297 frequency cortical-thalamic information transfer in real brain data.

### 298 **Cross-frequency information transfer between the cortex and thalamus is supported** 299 **by edge-of-chaos criticality: empirical results**

300 Because the K-statistic of the 0-1 chaos test can be calculated from empirical neural data, we ap-  
301 plied the test to our electrophysiology recordings. Confirming our predictions, the empirical re-  
302 sults recapitulated the relationship between thalamocortical chaoticity and cortical-thalamic cross-  
303 frequency information transfer observed in our mean-field model (Fig. 8), with maximal informa-  
304 tion transfer occurring for intermediary levels of estimated chaoticity (presumably reflecting prox-  
305 imity to edge-of-chaos criticality) (Fig. 9). Importantly, replicating both prior simulation and empir-  
306 ical results (*Toker et al., 2022*) as well as the novel simulation results presented above (Figure 8,  
307 Fig. 7-figure supplement 3D), we found that GABAergic anesthesia destabilized slow thalamocor-  
308 tical electrodynamics in both humans ( $p=0.002$ , one-tailed Wilcoxon signed-rank test comparing  
309 patients’ cross-trial median K-statistic during waking states versus propofol anesthesia states) and  
310 rats ( $p=0.002$ , one-tailed Wilcoxon signed-rank test). Conversely, slow thalamocortical activity be-  
311 came periodic or hyper-stable during generalized spike-and-wave seizures ( $p=0.0078$ , one-tailed  
312 Wilcoxon signed-rank test). Finally, 5-MeO-DMT moderately stabilized cortical electrodynamics  
313 ( $p=0.03$ , one-tailed Wilcoxon signed-rank test), which is consistent with prior results showing that  
314 psychedelics tune slow neural electrodynamics closer to edge-of-chaos criticality, and do so by ap-  
315 proaching the critical point from the chaotic side of the edge (*Toker et al., 2022*). Finally, while the

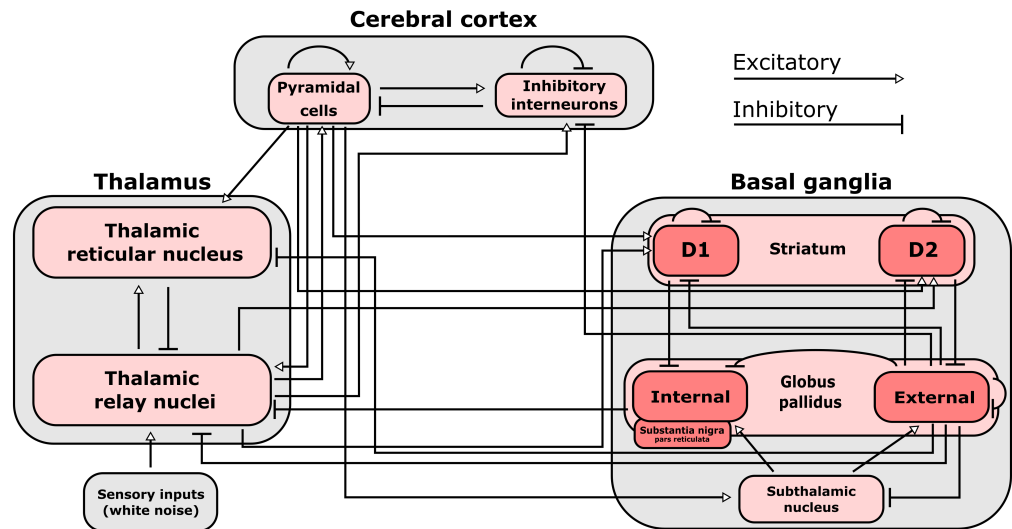

**Figure 6.** Connections included in our mean-field model of the macro-scale electrodynamics of the basal ganglia-thalamo-cortical system. Note that the internal globus pallidus and the substantia nigra pars reticulata, which are both inhibitory output nuclei of the basal ganglia, are treated as a single structure. See Supplementary File 2 for the mean firing rates for each neural population in the model, alongside known region-specific firing rates in multiple mammalian species. See Supplementary File 3 for parameters describing the properties of each neural population, as well as parameters of electric fields along each anatomical connection.

316 estimated chaoticity of low-frequency (1.625-13 Hz) thalamocortical electrodynamics varied signif-  
317 icantly across brain states ( $p=0.0001$ , permutation-based nonparametric ANCOVA), this variance  
318 could not be explained by changes to spectral power in this frequency range in the thalamocorti-  
319 cal system across brain states (Supplementary File 4).

## 320 Discussion

321 We here identified a highly preserved spectral pattern of cross-frequency information transfer be-  
322 tween the cortex and thalamus across species during waking states, wherein information sent from  
323 one brain structure at low frequencies (1.625-13 Hz) is encoded by the other at high frequencies  
324 (~50-100 Hz). We moreover showed that this pattern of information transfer is disrupted dur-  
325 ing unconscious states, possibly because low-frequency thalamocortical electrodynamics diverge  
326 from edge-of-chaos criticality during these states. Conversely, we showed that this low-to-high fre-  
327 quency information transfer from the cortex to the thalamus is enhanced during psychedelic states,  
328 possibly because slow thalamocortical electrodynamics are tuned closer to edge-of-chaos critical-  
329 ity during these states (and approach this critical point from the chaotic side of the edge, where  
330 our evidence suggests normal waking slow thalamocortical electrodynamics lie). Note that we did  
331 not observe a significant increase in cross-frequency information transfer from the thalamus to  
332 cortex during psychedelic states, though this may be due to our small sample size of animals in  
333 this condition ( $n=5$ ).

334 To provide theoretical evidence for this relationship between edge-of-chaos criticality and cross-  
335 frequency cortical-thalamic information transfer, we used Bayesian-genetic optimization to tune a  
336 mean-field model of the electrodynamics of the full basal ganglia-thalamo-cortical system, so that  
337 it could recapitulate diverse aspects of real neural electrodynamics while using biologically realistic  
338 parameters (see Methods). Given the broad biological realism of our model of the basal ganglia-  
339 thalamo-cortical system, we believe that the model - or perhaps future versions of it, which are  
340 even more closely matched to empirical results from multiple brain states - may be a fruitful tool  
341 for future *in silico* studies of possible interventions to modulate consciousness.

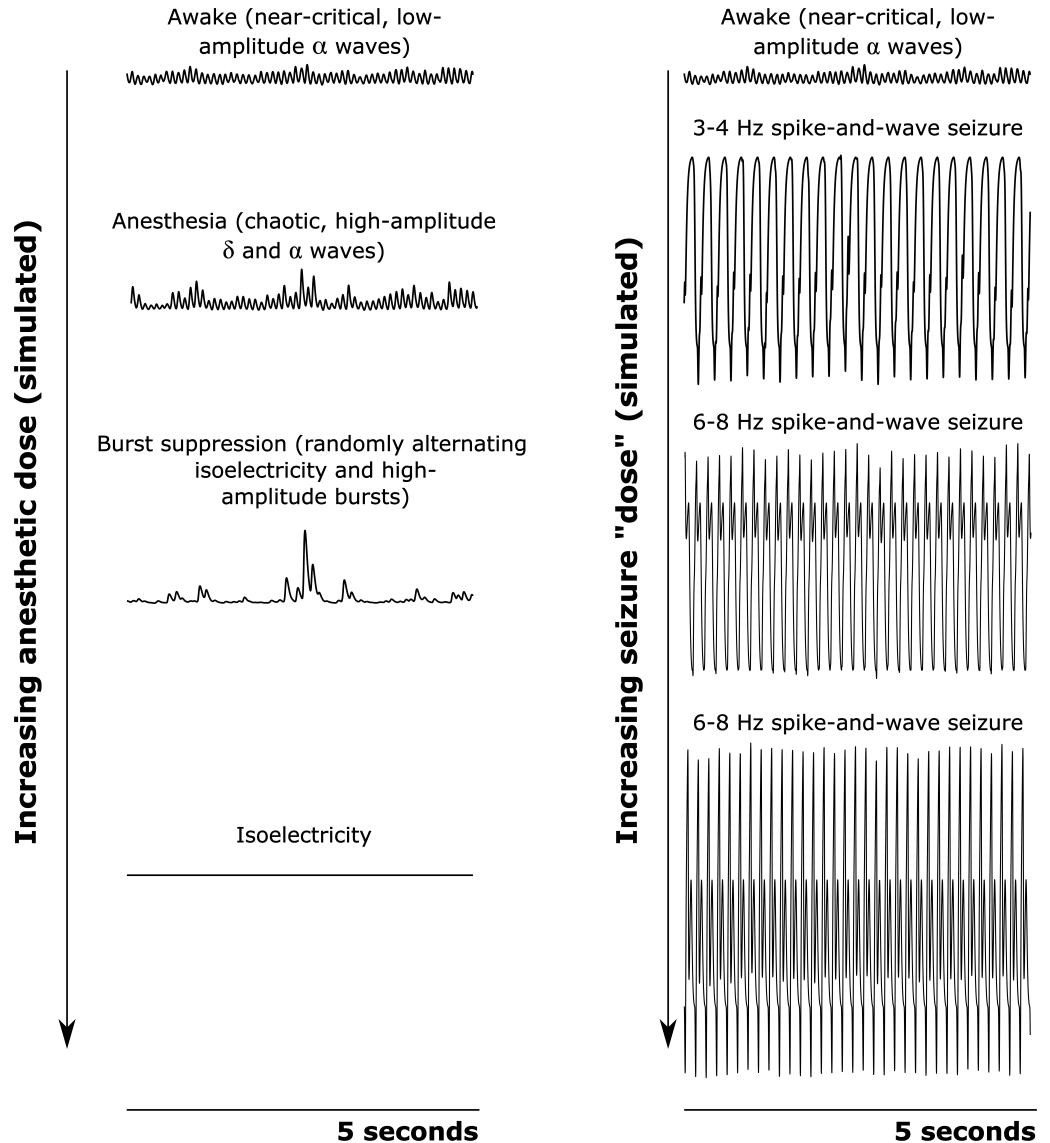

**Figure 7.** Simulated cortical local field potentials (LFPs) as a function of increasing anesthetic or seizure "dose." Note that all data plotted here are on the same scale. For our awake simulation (top), the mean-field model generates near-critical, weakly chaotic, low-amplitude oscillations dominated by  $\alpha$  waves (8-13 Hz), with significant bidirectional cross-frequency information transfer between the cortex and thalamus (as observed in our empirical data). With increasing anesthetic dose (left), the simulated cortical LFP transitions to chaotic, high-amplitude  $\delta$  waves (1-4 Hz) and  $\alpha$  waves. At a higher dose, the simulated cortical LFP transitions to burst suppression-like dynamics, which are characterized by stochastic switching between isoelectricity and high-amplitude bursts. Finally, at the highest anesthetic doses, the simulated cortical LFP transitions to isoelectricity. This simulated anesthetic dose-response trajectory closely mirrors well-established empirical dose-response trajectories. For our seizure simulation (right), increasing "doses" first push the cortical LFP into a 3-4 Hz spike-and-wave seizure (which is characteristic of human epilepsy patients), followed by a 6-8 Hz spike-and-wave seizure (which is characteristic of rodent models of epilepsy, including the GAERS rats studied here).

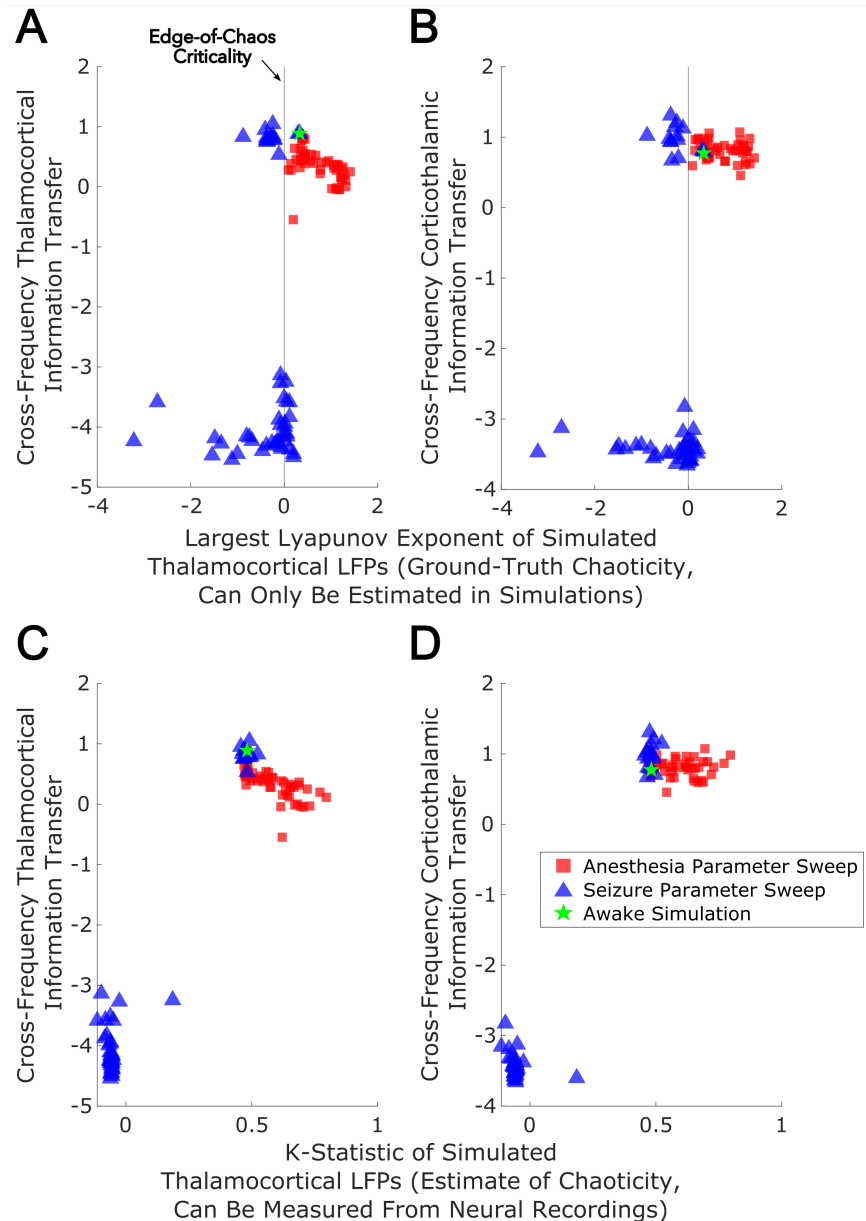

**Figure 8.** We performed parameter sweeps for different "doses" of simulated anesthetic (red square) and seizure (blue triangle) effects. For each "dose," we calculated the median estimated largest Lyapunov exponent (LLE) of simulated thalamocortical LFPs across 10 runs, and plotted the median strength of cross-frequency thalamocortical (A) and corticothalamic (B) information transfer as a function of those median LLEs. We found a clear peak in the strength of bidirectional cross-frequency cortical-thalamic information transfer when our simulated thalamocortical electrodynamics were poised near edge-of-chaos criticality (the vertical lines at LLE=0). We further found that the strength of this bidirectional, cross-frequency information transfer decayed in both the periodic phase (negative LLEs) with increasing seizure effect and the chaotic phase (positive LLEs) with increasing anesthetic effect. However, because this decay was exponentially faster in the periodic phase, we here plotted the bi-symmetric log-transform ([Webber, 2012](#)) of our results for the sake of visualization. Because LLEs can only be estimated with some accuracy in simulations, we also calculated the estimated the median chaoticity of the low-frequency (1.625-13 Hz) component of our simulated cortical and thalamic LFPs using the K-statistic of the modified 0-1 chaos (which can be measured from real neural recordings). We plotted those results against the (bi-symmetric log-transformed) median strength of cross-frequency thalamocortical (C) and corticothalamic (D) information transfer, and observed the same overall relationship between chaoticity and bidirectional cross-frequency information transfer, suggesting that this relationship can be evaluated in real neural recordings.

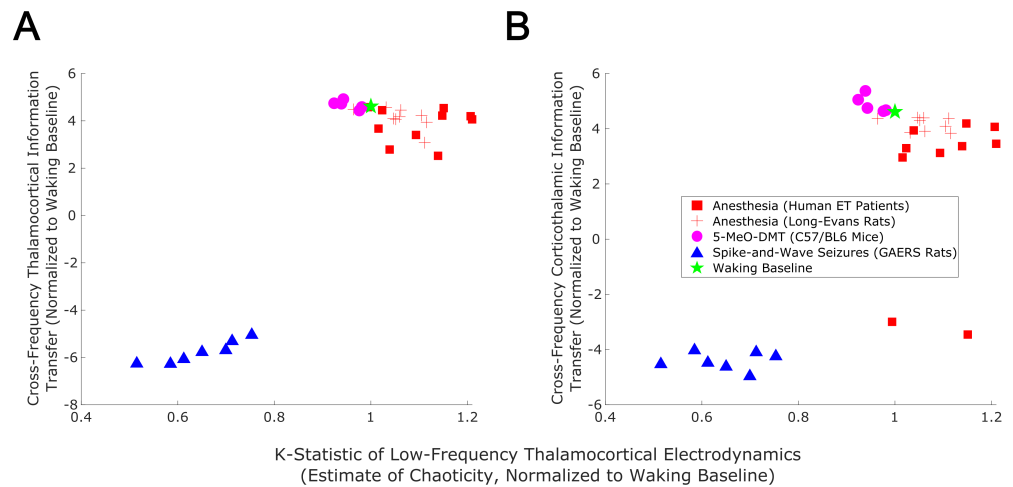

**Figure 9.** We here plot the median strength of cross-frequency thalamocortical (A) and corticothalamic (B) information transfer across brain states (normalized to each patient's or animal's waking baseline, and bi-symmetrically log-transformed) as a function of the median estimated chaoticity of the low-frequency (1.625-13 Hz) component of thalamic and cortical electric field recordings (also normalized to waking baselines). We found the same trend as in our mean-field model (Fig. 8), with bidirectional cross-frequency information transfer exhibiting the most pronounced decay as thalamocortical electrodynamicity hyper-stabilize in the generalized spike-and-wave seizure state. The strength of bidirectional cross-frequency information transfer also decays, though not as quickly, as thalamocortical electrodynamicity become increasingly chaotic in the GABAergic anesthesia state. Conversely, the strength of cross-frequency information transfer from the cortex to the thalamus, but not from the thalamus to the cortex, increases as thalamocortical electrodynamicity moderately stabilize in the 5-MeO-DMT psychedelic state, presumably reflecting a transition closer to edge-of-chaos criticality relative to normal waking states, which are near-critical but weakly chaotic.

342 Although both our empirical and simulated thalamocortical electrodynamicity show clear evi-  
343 dence of cross-frequency cortical-thalamic information transfer, and that the strength of this cross-  
344 frequency information transfer is supported by the proximity of thalamocortical electrodynamicity  
345 to edge-of-chaos criticality, much work remains to be done to explain this frequency-specific com-  
346 munication pattern during conscious states. In other words, the precise code of cross-frequency  
347 communication remains to be determined. It is possible, for example, that this code will be related  
348 to mechanisms that are by now well-established in the neuroscience literature, such as the mod-  
349 ulation of the amplitude of high-frequency activity by the phase of low-frequency activity (*Canolty  
350 and Knight, 2010*). Indeed, our observation of cross-frequency information transfer between tha-  
351 lamus and cortex is, at least conceptually, consistent with prior evidence of low-to-high frequency  
352 phase-amplitude coupling between these regions during waking states (*FitzGerald et al., 2013;  
353 Malekmohammadi et al., 2019; Opri et al., 2019; Malekmohammadi et al., 2015*); however, it is  
354 important to note that, unlike the strength of directed cross-frequency information transfer, the  
355 strength of phase-amplitude coupling did not consistently vary as a function of brain state (Fig. 3-  
356 figure supplement 2, Fig. 5-figure supplement 2), which suggests that these are somewhat distinct  
357 phenomena. It may also be that cross-frequency cortical-thalamic information transfer could rely  
358 on coding mechanisms which have not yet been explored in the neuroscience literature, but which  
359 have been explored in the communications engineering literature, such as low-to-high-frequency  
360 information transfer using the harmonic backscattering of low-frequency signals (*An et al., 2018*).

361 We note several limitations to the work done here, and fruitful areas for further investigation.  
362 First, we stress that currently, varying degrees of chaoticity - and therefore proximity to edge-of-  
363 chaos criticality - can only be detected with some certainty in simulations. The modified 0-1 chaos  
364 test, which we used here as an empirical test of chaoticity, is a relatively robust method for chaos  
365 detection (*Toker et al., 2020*), correlates well with ground-truth chaoticity in our mean-field model,

366 and reproduces the relationship between chaoticity and cross-frequency cortical-thalamic infor-  
367 mation transfer observed in our simulations; but, the test's results may be affected by features of  
368 a signal, such as noise, which are unrelated to ground-truth chaoticity. For this reason, it will be  
369 imperative to develop additional methods for assessing the chaoticity of thalamocortical electro-  
370 dynamics in order to confirm or falsify the observations reported here. It will moreover be impor-  
371 tant to study how generalized seizures, anesthesia, and psychedelics affect information transfer  
372 between the cortex and other subcortical regions which have been implicated in the loss and re-  
373 covery of consciousness, such as the basal ganglia (*Miyamoto et al., 2019; Deransart et al., 2000;*  
374 *Chen et al., 2015b; DiCesare et al., 2020; Crone et al., 2017; Lutkenhoff et al., 2015, 2020; Lazarus*  
375 *et al., 2012; Qiu et al., 2016a; Vetrivelan et al., 2010; Qiu et al., 2016b, 2010*), and how that in turn  
376 relates to the proximity of thalamocortical electro-dynamics to edge-of-chaos criticality. In a similar  
377 vein, it will also be important to test whether the observed phenomena extend to other states of  
378 unconsciousness (e.g. coma and vegetative states) and other psychedelic states (e.g. induced by  
379 lysergic acid diethylamide or psilocybin).

## 380 Methods and Materials

### 381 Mean-field model of the electro-dynamics of the basal ganglia-thalamocortical system. 382

383 To study the relationship between edge-of-chaos criticality and cross-frequency cortical-thalamic  
384 information transfer, and how that might change during GABAergic anesthesia and generalized  
385 spike-and-wave seizures, we developed a modified version of the mean-field model of the basal  
386 ganglia-thalamocortical system described by van Albada and Robinson (*van Albada and Robinson,*  
387 *2009*). Although our empirical analysis focuses on thalamo-cortical interactions, we chose a model  
388 which includes the basal ganglia because of recent evidence that the basal ganglia (perhaps via  
389 their influence on the thalamus and cortex) are involved in the loss and recovery of conscious-  
390 ness from generalized seizures (*Miyamoto et al., 2019; Deransart et al., 2000; Chen et al., 2015b*),  
391 anesthesia (*DiCesare et al., 2020; Crone et al., 2017*), vegetative and minimally conscious states  
392 (*Lutkenhoff et al., 2015, 2020*), and sleep (*Lazarus et al., 2012; Qiu et al., 2016a; Vetrivelan et al.,*  
393 *2010; Qiu et al., 2016b, 2010*).

394 The model simulates the average firing rate of several populations of neurons, which is esti-  
395 mated as the proportion of neurons within a population whose membrane potential is greater  
396 than their reversal potential, multiplied by the maximum possible firing rate for that population.  
397 Specifically, the average population activity  $Q_a$  at location  $r$  and time  $t$  is modeled as a sigmoidal  
398 function of the number of cells whose potential  $V_a$  is above the mean threshold potential  $\theta$  of that  
399 population:

$$Q_a(r, t) = \frac{Q_a^{\max}}{1 + \exp[-(V_a(t) - \theta_a)/\sigma']} \quad (1)$$

400 where  $Q_a^{\max}$  is the maximum possible firing rate of that population and  $\sigma'$  is the standard deviation  
401 of cell body potentials relative to the threshold potential. The change in mean cell potential  $V_a$  is  
402 modeled as:

$$D_{\alpha\beta}(t)V_a(t) = \sum_b v_{ab}\phi_b(t - \tau_{ab}) \quad (2)$$

403 where  $v_{ab}$  is the number of synapses between the axons of population  $b$  and dendrites of population  
404  $a$  multiplied by the typical change in the membrane potential of a cell in  $a$  with each incoming  
405 electric pulse from  $b$ .  $\phi_b(t - \tau_{ab})$  is the rate of incoming pulses from  $b$  to  $a$ ,  $\tau_{ab}$  is the time delay for  
406 signals traveling across axons from  $b$  to  $a$ , and  $D_{\alpha\beta}$  is the differential operator

$$D_{\alpha\beta}(t) = \frac{1}{\alpha\beta} \frac{d^2}{dt^2} + \left( \frac{1}{\alpha} + \frac{1}{\beta} \right) \frac{d}{dt} + 1 \quad (3)$$

407 where  $\alpha$  is the decay rate of the cell membrane potential and  $\beta$  is the rise rate of the neural mem-  
408 brane potential. In the original Robinson mean-field model, not only the duration, but also the



409 peak  $\eta$  of synaptic responses is scaled by  $\alpha$  and  $\beta$ :

$$\eta(\alpha, \beta) = \frac{\alpha\beta}{\beta - \alpha} \left[ \exp\left(-\alpha \frac{\ln(\beta/\alpha)}{\beta - \alpha}\right) - \exp\left(-\beta \frac{\ln(\beta/\alpha)}{\beta - \alpha}\right) \right] \quad (4)$$

410 However, since we are interested in modeling GABAergic anesthesia, which prolongs the duration  
 411 of postsynaptic inhibition - an effect that can be simulated by modulating the synaptic decay rate  
 412  $\alpha$  (*Hindriks and van Putten, 2012; Hutt and Longtin, 2010*) or potentially the rise rate  $\beta$  - without  
 413 altering the maximal postsynaptic chloride current (*Kitamura et al., 2003*), we followed prior mod-  
 414 eling studies of anesthesia (*Hindriks and van Putten, 2012; Hutt and Longtin, 2010; Bojak and Liley,*  
 415 *2005; Noroozbabae et al., 2021*) and modified the synaptic response  $h$ , such that its duration but  
 416 not its peak is modulated by  $\alpha$  and  $\beta$ :

$$h(t) = \frac{H}{\eta(\alpha, \beta)} \bar{h}(t) \quad (5)$$

417 where  $\bar{h}(t)$  is the original synaptic response, and, following Hindriks and van Putten (*Hindriks and*  
 418 *van Putten, 2012*),  $H=31.5 \text{ s}^{-1}$ . Finally, the outgoing mean electric field  $\phi_{ab}$  from population  $b$  to  
 419 population  $a$  is modeled with the widely used damped wave equation

$$D_{ab}\phi_{ab}(r, t) = Q_b(r, t) \quad (6)$$

420 with

$$D_{ab} = \left[ \frac{1}{\gamma_{ab}^2} \frac{\partial^2}{\partial t^2} + \frac{2}{\gamma_{ab}} \frac{\partial}{\partial t} + 1 - r_{ab}^2 \nabla^2 \right] \quad (7)$$

421 where  $r_{ab}$  is the spatial axonal range,  $\gamma_{ab}$  is the temporal damping coefficient and equals  $v_{ab}/r_{ab}$ , and  
 422  $\nabla^2$  is the Laplacian operator.

423 Importantly, apart from circuit connectivity described in the original van Albada and Robinson  
 424 model, we included several additional known afferent projections from the globus pallidus externa  
 425 (GPe) (Fig. 6), given the recent evidence for the importance of the GPe in particular in regulating  
 426 the loss and recovery of consciousness (*Lazarus et al., 2012; Qiu et al., 2016a; Vetrivelan et al.,*  
 427 *2010; Qiu et al., 2016b, 2010; Zheng and Monti, 2019*). Specifically, in light of recent tracing stud-  
 428 ies in mice showing direct GABAergic projections from GPe to GABAergic cortical interneurons  
 429 (*Saunders et al., 2015; Chen et al., 2015a*), as well as recent high angular resolution diffusion imag-  
 430 ing showing direct projections from GPe to cortex in humans (*Zheng and Monti, 2019*), we added  
 431 inhibitory connections from GPe to inhibitory cortical neurons. We also added direct inhibitory  
 432 projections from GPe to thalamic relay nuclei, following recent human high angular resolution dif-  
 433 fusion imaging results (*Zheng and Monti, 2019*). Moreover, following results from tracing studies  
 434 in squirrel monkeys (*Hazrati et al., 1991*), we additionally added direct inhibitory projections from  
 435 GPe to the thalamic reticular nucleus. We furthermore added inhibitory connections from GPe to  
 436 both D1 and D2 striatal populations, based on extensive prior tracing studies showing pallidostri-  
 437 atal projections in rats (*Kuo and Chang, 1992; Staines et al., 1981; Kuo and Chang, 1992; Staines*  
 438 *and Fibiger, 1984; Rajakumar et al., 1994*), cats (*Beckstead, 1983*), and monkeys (*Beckstead, 1983;*  
 439 *Kita et al., 1999; Sato et al., 2000*).

440 The model thus constructed contains 185 free parameters. In the original model, van Albada  
 441 and Robinson identified a parameter configuration within physiologically realistic bounds that pro-  
 442 duced stable fixed points of neuronal firing rates for each brain region, which can be analytically  
 443 identified using well-known mathematical tools. Under this approach, fluctuations of neuronal  
 444 firing rates are generated via noise perturbations away from and back toward these stable fixed  
 445 points. However, this approach assumes that macroscale neural electrodynamic are perfectly  
 446 stable unless perturbed, which is contradicted by some empirical evidence: low-frequency electro-  
 447 dynamic oscillations have been observed in the absence of any sensory inputs or perturbations in  
 448 isolated, deafferented cortex (*Timofeev et al., 2000; Lemieux et al., 2014*) and in deafferented tha-  
 449 lamic reticular nucleus (*Steriade et al., 1987*), as well as in unperturbed cerebral organoids (*Trujillo*

450 *et al., 2019; Samarasinghe et al., 2019*). Moreover, this modeling approach assumes that neural  
451 electrodynamic oscillations are predominantly stochastic, which our current (Supplementary File  
452 5) and past (*Toker et al., 2022*) work suggest is not the case. In line with this broad empirical evi-  
453 dence for intrinsic low-frequency, nonlinear oscillatory electrical activity in the brain, other mean-  
454 field modeling approaches have sought instead to understand slow neural electrodynamics (in  
455 both waking and non-waking states) in terms of (often chaotic) nonlinear oscillations, rather than  
456 in terms of noise perturbations of stable fixed points (*Dafilis et al., 2001; Steyn-Ross et al., 2013;*  
457 *Freeman, 1987*). In accordance with this approach, we sought a physiologically realistic parameter  
458 configuration for waking brain states that would yield low-amplitude, oscillatory, weakly chaotic  
459 oscillations of local field potentials (LFPs), where the LFPs of a given neural population were simu-  
460 lated by taking the superposition of synaptic currents (*Buzsáki et al., 2012*), estimated as the sum  
461 of the absolute value of dendritic potentials of that population (*Mazzoni et al., 2015*). In addition  
462 to meeting this criterion of generating low-amplitude, weakly chaotic LFPs, we sought a parameter  
463 configuration for waking states which yields mean firing rates for all brain regions that match em-  
464 pirical data, which generates fluctuations in cortical firing rates that are correlated with fluctuations  
465 in the amplitude of high gamma (60-200 Hz) cortical LFP oscillations, and which additionally reca-  
466 pitulates the spectral patterns of bidirectional cortico-thalamic information transfer we identified  
467 in our empirical data. Because there are no methods for deriving such a parameter configuration  
468 analytically, and because the parameter space of the model is infinite (though bounded) and thus  
469 impossible to explore through a systematic parameter sweep, we used a Bayesian-genetic machine  
470 learning algorithm (*Lan et al., 2020*) to tune all parameters in the model to produce the desired  
471 dynamics (see Supplementary Methods and Fig. 6-figure supplement 1-3 for flowcharts describing  
472 the details of the Bayesian-genetic optimization).

473 Once we identified a parameter configuration for waking brain states (Supplementary File 3),  
474 we used that parameter configuration as the starting point for a search, using genetic optimization,  
475 for parameter configurations that would produce GABAergic anesthesia and generalized spike-and-  
476 wave seizure dynamics. For the seizure dynamics, we simply tuned the model's parameters to gen-  
477 erate 2-8 Hz oscillations that are periodic and information-poor (as indexed by Lempel-Ziv complex-  
478 ity), which resulted in spike-and-wave behavior. For the anesthesia dynamics, we tuned the model's  
479 parameters to minimize the cortical firing rate while simultaneously generating information-poor,  
480 strongly chaotic LFPs that are dominated by large-amplitude slow/delta (<4 Hz) oscillations with  
481 low spectral power above 60 Hz. Once we identified a set of parameters for our awake simula-  
482 tion, our anesthesia simulation, and our spike-and-wave seizure simulation (Supplementary File  
483 3), we used the following equation to produce a given parameter set  $P$  at a particular "dose"  $D$  of  
484 simulated anesthetic or seizure effect:

$$P = P_0 \left( \frac{P_1}{P_0} \right)^D \quad (8)$$

485 where  $P_0$  is the vector of parameters corresponding to our awake simulation and  $P_1$  is the vector of  
486 parameters corresponding to either our anesthesia or seizure simulation. Thus, as  $D$  is increased,  
487 the model's parameters move from their "awake" values at  $D = 0$  to their values in "altered" states  
488 at  $D = 1$ . Moreover, reflecting biological saturation effects, the magnitude of change in model  
489 parameters becomes increasingly small as  $D$  is further increased, and no parameters change signs  
490 with higher values of  $D$ .

### 491 **Calculating stochastic Lyapunov exponents**

492 To determine the chaoticity of the mean-field model's dynamics, we estimated the stochastic largest  
493 Lyapunov exponent across our simulated cortical and thalamic LFPs. In general, Lyapunov expo-  
494 nents measure the rate of divergence between initially nearby points in a system's phase space: a  
495 positive largest Lyapunov exponent signifies chaos (because it indicates that initially similar states  
496 diverge exponentially fast), a negative largest Lyapunov exponent signifies periodicity (because it in-

497 dicates that initially similar states *converge* exponentially fast), and a largest Lyapunov exponent of  
498 zero indicates edge-of-chaos criticality, with near-zero exponents indicating near-critical dynamics  
499 (*Ovchinnikov et al., 2020*). For any given parameter configuration, stochastic Lyapunov exponents  
500 were estimated by running the model once for 20 seconds with random initial conditions, and then  
501 running it again, but adding a tiny random perturbation to all neural populations at 9.999 seconds,  
502 and then measuring the rate of the divergence of the simulated cortical and thalamic LFPs over  
503 the two runs over the final 10 seconds of the simulation. The divergence  $\epsilon(t)$  between the first run  
504  $Q_e^{(1)}$  and the second run  $Q_e^{(2)}$  was estimated as their summed squared-difference:

$$\epsilon(t) = (Q_e^{(1)}(t) - Q_e^{(2)}(t))^2 / \epsilon^{\max} \quad (9)$$

505 where  $\epsilon^{\max}$  is the maximum possible difference between the two simulations:

$$\epsilon^{\max} = \left( \max(Q_e^{(1)}) - \min(Q_e^{(2)}) \right)^2 \quad (10)$$

506 The largest Lyapunov exponent  $\Lambda$  of the model's dynamics is then determined by estimating the  
507 rate of divergence between the two runs  $\epsilon(t)$ :

$$\epsilon(t) = \epsilon(0)\exp(\Lambda t) \quad (11)$$

508 where  $\epsilon(0)$  is the distance between  $Q_e^{(1)}$  and  $Q_e^{(2)}$  at  $t = 0$ . The slope of  $\ln\epsilon(t)$ -versus- $t$  therefore gives  
509 the estimate of the largest Lyapunov exponent. For all parameter configurations,  $Q_e^{(1)}$  and  $Q_e^{(2)}$   
510 were run with identical noise inputs, meaning that the slope of  $\ln\epsilon(t)$ -versus- $t$  gives the stochastic  
511 Lyapunov exponent of the model.

### 512 **Human essential tremor patient propofol data**

513 Data previously published by *Malekmohammadi et al. (2019)* were re-analyzed in order to assess  
514 the relationship between the stability of neural electrodynamics and the breakdown of thalamo-  
515 cortical communication during GABAergic anesthesia. Data were collected from 10 essential tremor  
516 patients (6 female and 4 male, ages 60-79 years) undergoing unilateral (n=6) or bilateral (n=4) im-  
517 plantation of deep brain stimulation (DBS) leads in the ventral intermediate (ViM) nucleus of the  
518 thalamus. All subjects provided written informed consent to participate in the original study, which  
519 was approved by the institutional review board of the University of California, Los Angeles. Lo-  
520 cal field potentials (LFPs) were recorded from the ViM thalamus, and electrocorticography (ECoG)  
521 signals were recorded from ipsilateral frontoparietal cortex during resting wake states and after  
522 intravenous propofol administration. Signals were acquired using BCI2000 v3 connected to an am-  
523 plifier (g.Tec, g.USBamp 2.0) at a sampling rate of 2400 Hz. Data were bandpass filtered online  
524 between 0.1 and 1000 Hz. Patients were awake with eyes open for the first minute of recording.  
525 We used this minute of data for each patient's "awake" state. After this first minute, the attending  
526 anaesthesiologist administered propofol intravenously. All patients reached a modified observer's  
527 assessment of alertness/sedation scale (MOAA/S) of 0, indicating no responsiveness, or 1, indi-  
528 cating only responses to noxious stimuli. On average, LFP and ECoG recording continued for 5  
529 minutes after propofol administration. To control for cross-patient differences in blood volume,  
530 cardiac output, and propofol dosing, we exclusively analyzed the final minute of recording as each  
531 patient's "anesthetized" state, during which they were maximally anesthetized. Data were split into  
532 10-second trials, demeaned, detrended, and band-stop filtered at 60 Hz and harmonics (to filter  
533 out line noise). Data were then visually inspected for artifacts, and 10-second trials with artifacts  
534 spanning multiple channels were removed.

### 535 **Long-Evans rat propofol data**

536 Data previously published by Reed and Plourde (*Reed and Plourde, 2015*) were re-analyzed to eval-  
537 uate the effect of propofol on neural criticality and cortical-thalamic information transfer in nine  
538 male Long-Evans rats. Bipolar electrodes were inserted into the ventral posteromedial nucleus of

539 the thalamus and sensory (barrel) cortex. A reference electrode was placed in the contralateral  
540 parietal bone and a ground was placed in the ipsilateral frontal bone. Propofol was administered  
541 in the right jugular vein catheter to achieve incrementally higher plasma propofol concentrations  
542 of 3  $\mu\text{g/ml}$ , 6  $\mu\text{g/ml}$ , 9  $\mu\text{g/ml}$ , and 12  $\mu\text{g/ml}$ . Target plasma concentrations were achieved using  
543 using pharmacokinetic parameters derived from *Knibbe et al. (2005)* with the Harvard-22 syringe  
544 pump, which was controlled by the Stanpump software (Department of Anesthesiology, Stand-  
545 ford University, CA). LFPs for each condition were recorded after 15 minutes of drug equilibration.  
546 Unconsciousness, defined as complete loss of the righting reflex, was achieved by 9  $\mu\text{g/ml}$  in all  
547 animals. In our primary analyses, we used LFPs from the 12  $\mu\text{g/ml}$  condition. Data were split into  
548 10-second trials, demeaned, detrended, and band-stop filtered at 60 Hz and harmonics (to filter  
549 out line noise). Data were then visually inspected for artifacts, and 10-second trials with artifacts  
550 spanning multiple channels were removed.

### 551 **GAERS rat seizure data**

552 Previously published (*Miyamoto et al., 2019*) data from seven Genetic Absence Epilepsy Rat from  
553 Strasbourg (GAERS) animals (both sexes, over 16 weeks of age), which experience spontaneous 6-8  
554 Hz generalized spike-and-wave seizures, were provided by H.M. and K.Y. and re-analyzed. Stain-  
555 less steel ECoG electrodes (1.1 mm diameter) were placed over the right somatosensory cortex  
556 under 2% isoflurane anesthesia. A stainless-steel electrode, which served as both ground and refer-  
557 ence, was placed on the cerebellum. An insulated stainless steel wire (200- $\mu\text{m}$  diameter) was  
558 stereotaxically implanted in the ventroposterior thalamus contralateral to the ECoG electrode, as  
559 well as in other cortical and subcortical sites not analyzed here. For our analyses, we only selected  
560 data from generalized spike-and-wave seizures which continued for a minimum of 10 seconds.  
561 Data were split into 10-second trials, demeaned, detrended, and band-stop filtered at 50 Hz and  
562 harmonics (to filter out line noise). Data were then visually inspected for artifacts, and 10-second  
563 trials with artifacts spanning multiple channels were removed.

### 564 **C57/bl6 mouse 5-MeO-DMT data**

565 Previously published (*Riga et al., 2018*) LFP recordings from five male, 9-16 week-old C57/bl6 mice  
566 (wild-type) following administration of either saline or 5-MeO-DMT were provided by M.S.R. and  
567 L.L.P. and re-analyzed here. For electrode implantation, animals were first pretreated with 0.05  
568 mg/kg s.c of the analgesic buprenorphine. Thirty minutes later, anesthetic unconsciousness was  
569 induced with 2.5% isoflurane and maintained with 1.5% isoflurane. Three stabilizer screws and a  
570 ground screw were implanted, and Plastics One electrodes (Virginia, USA) were placed in medial  
571 prefrontal cortex (mPFC) and mediodorsal nucleus of the thalamus (MD), as well as other cortical  
572 areas not analyzed here (as they are not directly connected to the MD nucleus). A prophylactic  
573 antibiotic (Enrofloxacin 7.5 mg/kg s.c.) and the analgesic buprenorphine (0.05 mg/kg s.c.) were  
574 administered for 2-3 days after surgery. LFP recordings from mPFC and MD were collected at a  
575 sampling rate of 3,200 Hz using a digital Lynx system and Cheetah software (Neuralynx, Montana,  
576 USA) in a 40 x 40 cm open field, and bandpass filtered between 0.1 and 100 Hz. On the record-  
577 ing day, first 10 ml/kg saline was injected subcutaneously, and 30 min later, saline + 5-MeO-DMT  
578 (5 mg/kg) was injected subcutaneously. LFPs were recorded for 30 minutes for each condition.  
579 The first five minutes after each injection were excluded from the analysis, in light of prior pharma-  
580 cokinetic and behavioral studies on 5-MeO-DMT in mice (*Halberstadt et al., 2011; Shen et al., 2011;*  
581 *van den Buuse et al., 2011*). Data were split into 10-second trials, demeaned, detrended, and band-  
582 stop filtered at 50 Hz and harmonics (to filter out line noise). Data were then visually inspected for  
583 artifacts, and 10-second trials with artifacts spanning multiple channels were removed.

### 584 **Estimating chaoticity of neural electrodynamics**

585 To estimate the chaoticity of real low-frequency neural electrodynamics, we used the modified 0-1  
586 chaos test. The 0-1 test for chaos was initially developed by Gottwald and Melbourne (*Gottwald*

587 *and Melbourne, 2004*), who later modified the test so that it was more robust to measurement  
 588 noise (*Gottwald and Melbourne, 2005*). Dawes and Freeland modified the test further, so that it  
 589 could more accurately distinguish between chaotic dynamics on the one hand, and strange non-  
 590 chaotic dynamics on the other (*Dawes and Freeland, 2008*). This final modified 0-1 test involves  
 591 taking a univariate time-series  $\phi$ , and using it to drive the following two-dimensional system:

$$\begin{aligned} p(n+1) &= p(n) + \phi(n)\cos cn \\ q(n+1) &= q(n) + \phi(n)\sin cn \end{aligned} \quad (12)$$

592 where  $c$  is a random value bounded between 0 and  $2\pi$ . For a given  $c$ , the solution to Eq. 12 yields:

$$\begin{aligned} p_c(n) &= \sum_{j=1}^n \phi(j)\cos jc \\ q_c(n) &= \sum_{j=1}^n \phi(j)\sin jc \end{aligned} \quad (13)$$

593 If the time-series  $\phi$  is generated by a periodic system, the motion of  $\mathbf{p}$  and  $\mathbf{q}$  is bounded, whereas  
 594 if  $\phi$  is generated by a chaotic system,  $\mathbf{p}$  and  $\mathbf{q}$  display asymptotic Brownian motion. This can be  
 595 quantified by assessing the growth rate of the time-averaged mean square displacement of  $\mathbf{p}$  and  
 596  $\mathbf{q}$ , plus a noise term  $\eta_n$  proposed by Dawes and Freeland (*Dawes and Freeland, 2008*):

$$M_c(n) = \frac{1}{N} \sum_{j=1}^N ([p_c(j+n) - p_c(j)]^2 + [q_c(j+n) - q_c(j)]^2) + \sigma\eta_n. \quad (14)$$

597 where  $\eta_n$  is a uniformly distributed random variable between  $[-\frac{1}{2}, \frac{1}{2}]$  and  $\sigma$  is the noise level. The  
 598 growth rate of the mean squared displacement can be assessed using a correlation coefficient:

$$K_c = \text{corr}(n, M_c(n)) \quad (15)$$

599  $K$  is computed for 100 unique values of  $c$  sampled randomly between 0 and  $2\pi$ . The final  $K$ -statistic  
 600 is the median  $K$  across all values of  $c$ . The  $K$ -statistic will approach 1 for chaotic systems and will  
 601 approach 0 for periodic systems (*Gottwald and Melbourne, 2004, 2005, 2009, 2008; Dawes and*  
 602 *Freeland, 2008; Toker et al., 2020*). Finally, note that the modified test includes a parameter  $\sigma$ ,  
 603 which controls the level of added noise in Eq. 14. Based on our prior work examining the effects  
 604 of different values of  $\sigma$  on the test's classification performance (*Toker et al., 2020*), we set  $\sigma = 0.5$ .

605 The 0-1 chaos test is designed to estimate chaoticity from low-noise signals recorded from pre-  
 606 dominantly deterministic, discrete-time systems. As such, steps must generally be taken to reduce  
 607 measurement noise as much as possible, to determine that a signal is *not* generated by a predomi-  
 608 nantly stochastic system, and to discretize in time potentially oversampled signals from continuous  
 609 time systems. Following our prior work (*Toker et al., 2022*), we effectively cleaned up measurement  
 610 noise by only applying the test to low-frequency components of neural electrophysiology record-  
 611 ings. Low-frequency activity was extracted by band-pass filtering LFPs between 1.625 and 13 Hz  
 612 (matching the frequency range in our analysis of spectral information transfer). Band-pass filter-  
 613 ing was performed using EEGLAB's two-way least-squares finite impulse response filter, with the  
 614 filter order set to  $\frac{500\text{Hz}}{13\text{Hz}} \cdot \frac{75}{22}$  for an attenuation of 75 dB at the higher-frequency transition band of  
 615 13 Hz, following (*Harris, 2022*). However, we note that in our prior work, which only investigated  
 616 the chaoticity of cortical electrodynamics slower than 6 Hz, we used the Fitting Oscillations And  
 617 One Over F or "FOOOF" algorithm to identify channel-specific slow oscillation frequencies. Follow-  
 618 ing (*Armand Eyebe Fouda et al., 2014; Toker et al., 2022*), all signals were time discretized before  
 619 application of the 0-1 chaos test by taking only all local minima and maxima, where a local ex-  
 620 tremum was defined as having a prominence greater than 10% of the maximum amplitude of a  
 621 given signal. For a given 10-second window of data, the estimated chaoticity of slow thalamocorti-  
 622 cal electrodynamics was set as the median of such band-pass filtered and time-discretized signals  
 623 across all available cortical and thalamic channels. Finally, we used our previously described test  
 624 of stochasticity (*Toker et al., 2020, 2022*) to ensure that our neural electrophysiology recordings  
 625 were produced by predominantly deterministic dynamics (Supplementary File 5).

## 626 **Calculating directed information flow**

627 Because neural information flow is likely frequency-multiplexed, we used a spectral measure of  
628 information transfer, which was recently developed by *Pinzuti et al. (2020)*. The measure is based  
629 on transfer entropy, an information-theoretic estimate of the amount of information transferred  
630 from a source variable  $X$  to an influenced variable  $Y$ . Transfer entropy over a time-delay  $L$  can be  
631 formulated as the conditional mutual information between  $X$  and  $Y$ , where the condition is the  
632 history of  $Y$ :

$$T_{X \rightarrow Y} = I(Y_t; X_{t-1:t-L} | Y_{t-1:t-L}) \quad (16)$$

633 Effectively, this is a measure of the degree to which uncertainty about the future of  $Y$  is reduced by  
634 knowing the history of  $X$ , given the history of  $Y$ . In our implementation of the spectral information  
635 transfer algorithm (described further below), we used the Java Information Dynamics Toolkit (JIDT)  
636 (*Lizier, 2014*) to implement the method of Kraskov and colleagues (*Kraskov et al., 2004*) for model-  
637 free kernel estimation of probability distributions, which uses Kozachenko–Leonenko estimators of  
638 log-probabilities via nearest-neighbor counting (*Kozachenko and Leonenko, 1987*), a fixed number  
639  $K$  of nearest neighbors, and bias correction, with the embedded Schrieber history length  $k = 1$ . We  
640 scanned from 0.002 ms (one time-step at a sampling rate of 500 Hz) to 40 ms (20 time-steps at a  
641 sampling rate of 500 Hz) and picked a time-lag  $L$  for each individual time-series pair that maximized  
642 the estimated transfer entropy between those time-series (following *Wollstadt et al. (2017); Wibral*  
643 *et al. (2013)*).

644 The innovation described by Pinzuti and colleagues, which enables the estimation of informa-  
645 tion transfer at particular sending and receiving frequency bands, is to use the invertible maximum  
646 overlap discrete wavelet transform (MODWT) to create surrogate data in which dynamics in either  
647 the sending or receiving signal are randomized (in our case, using the Iterative Amplitude Adjust-  
648 ment Fourier Transform) only within a particular frequency range. The use of such surrogate sig-  
649 nals allows both for the estimation of the *strength* of spectrally resolved information transfer (by  
650 assessing, on average, how much transfer entropy is lost when dynamics in a certain frequency  
651 range of the sender and receiver are randomized), as well as the *statistical significance* of spectral  
652 information transfer (by quantifying the percentage of surrogates which result in estimated trans-  
653 fer entropy greater than the estimated transfer entropy between the original sender and receiver  
654 signals).

655 As described by Pinzuti and colleagues, this approach can be used to determine which fre-  
656 quency bands are significant channels for the sending *or* receiving of information. They moreover  
657 describe a variant of their approach, which they title the ‘swap-out swap-out’ or SOSO algorithm,  
658 which enables the determination of the specific frequency bands from which information is sent  
659 from one channel and the frequency bands from which that same information is then received  
660 by the other channel. We used this algorithm in all spectral analyses of information transfer in  
661 this paper. In order to maximize the overlap of the frequency bands assessed by the SOSO algo-  
662 rithm (which are determined by successive halves of the sampling rate) with those corresponding  
663 to canonical neural oscillations, we resampled all data for our information transfer analyses to a  
664 sampling frequency of 416 Hz. In our initial exploratory analysis in Fig. 2, we used the SOSO al-  
665 gorithm with only 10 surrogates (which is insufficient for determination of statistical significance)  
666 to estimate the strength of information transfer from and to all possible pairs of frequency bands  
667 between the cortex and thalamus during waking states. In all subsequent figures and in Table  
668 1, we used the SOSO algorithm with 100 surrogates, which is sufficient for the determination of  
669 statistical significance, and which additionally provides more reliable estimates of the strength of  
670 spectrally resolved information transfer.

## 671 Data Availability

672 The source data underlying Figures 2-4 and 8, and code necessary to perform all statistical analy-  
673 ses, information transfer analyses, and mean-field simulations will be available on Figshare upon  
674 publication of this manuscript. The raw electrophysiology recordings from Long-Evans rats are  
675 available at the Harvard Dataverse Network, with the following DOI: doi:10.7910/DVN/29366.

## 676 References

- 677 **Afrasiabi M**, Redinbaugh MJ, Phillips JM, Kambi NA, Mohanta S, Raz A, Haun AM, Saalman YB. Consciousness  
678 depends on integration between parietal cortex, striatum, and thalamus. *Cell systems*. 2021; 12(4):363–373.
- 679 **Akam T**, Kullmann DM. Oscillatory multiplexing of population codes for selective communication in the mam-  
680 malian brain. *Nature Reviews Neuroscience*. 2014; 15(2):111–122.
- 681 **van Albada SJ**, Robinson PA. Mean-field modeling of the basal ganglia-thalamocortical system. I: Firing rates  
682 in healthy and parkinsonian states. *Journal of theoretical biology*. 2009; 257(4):642–663.
- 683 **An Z**, Lin Q, Yang L. Cross-frequency communication: Near-field identification of uhf rfids with wifi! In: *Proceed-*  
684 *ings of the 24th Annual International Conference on Mobile Computing and Networking*; 2018. p. 623–638.
- 685 **Armand Eyebe Fouda J**, Bodo B, Sabat SL, Effa JY. A modified 0-1 test for chaos detection in oversampled time  
686 series observations. *International Journal of Bifurcation and Chaos*. 2014; 24(05):1450063.
- 687 **Bastos AM**, Donoghue JA, Brincat SL, Mahnke M, Yanar J, Correa J, Waite AS, Lundqvist M, Roy J, Brown EN, et al.  
688 Neural effects of propofol-induced unconsciousness and its reversal using thalamic stimulation. *Elife*. 2021;  
689 10.
- 690 **Beckstead RM**. A pallidostriatal projection in the cat and monkey. *Brain research bulletin*. 1983; 11(6):629–632.
- 691 **Bertschinger N**, Natschläger T. Real-time computation at the edge of chaos in recurrent neural networks.  
692 *Neural computation*. 2004; 16(7):1413–1436.
- 693 **Billard V**, Gambus PL, Chamoun N, Stanski DR, Shafer SL. A comparison of spectral edge, delta power, and  
694 bispectral index as EEG measures of alfentanil, propofol, and midazolam drug effect. *Clinical Pharmacology*  
695 *& Therapeutics*. 1997; 61(1):45–58.
- 696 **Boedecker J**, Obst O, Lizier JT, Mayer NM, Asada M. Information processing in echo state networks at the edge  
697 of chaos. *Theory in Biosciences*. 2012; 131(3):205–213.
- 698 **Bojak I**, Liley D. Modeling the effects of anesthesia on the electroencephalogram. *Physical Review E*. 2005;  
699 71(4):041902.
- 700 **Breakspear M**, Roberts JA, Terry JR, Rodrigues S, Mahant N, Robinson PA. A unifying explanation of primary  
701 generalized seizures through nonlinear brain modeling and bifurcation analysis. *Cerebral Cortex*. 2006;  
702 16(9):1296–1313.
- 703 **van den Buuse M**, Ruimschotel E, Martin S, Risbrough VB, Halberstadt AL. Enhanced effects of amphetamine  
704 but reduced effects of the hallucinogen, 5-MeO-DMT, on locomotor activity in 5-HT1A receptor knockout  
705 mice: implications for schizophrenia. *Neuropharmacology*. 2011; 61(1-2):209–216.
- 706 **Buzsáki G**, Anastassiou CA, Koch C. The origin of extracellular fields and currents—EEG, ECoG, LFP and spikes.  
707 *Nature reviews neuroscience*. 2012; 13(6):407–420.
- 708 **Canolty RT**, Knight RT. The functional role of cross-frequency coupling. *Trends in cognitive sciences*. 2010;  
709 14(11):506–515.
- 710 **Chao ZC**, Takaura K, Wang L, Fujii N, Dehaene S. Large-scale cortical networks for hierarchical prediction and  
711 prediction error in the primate brain. *Neuron*. 2018; 100(5):1252–1266.
- 712 **Chen MC**, Ferrari L, Sacchet MD, Foland-Ross LC, Qiu MH, Gotlib IH, Fuller PM, Arrigoni E, Lu J. Identification of  
713 a direct GABAergic pallidocortical pathway in rodents. *European Journal of Neuroscience*. 2015; 41(6):748–  
714 759.
- 715 **Chen M**, Guo D, Li M, Ma T, Wu S, Ma J, Cui Y, Xia Y, Xu P, Yao D. Critical roles of the direct GABAergic pallido-  
716 cortical pathway in controlling absence seizures. *PLoS Computational Biology*. 2015; 11(10):e1004539.

- 717 **Chen W**, Liu G, Su Y, Zhang Y, Lin Y, Jiang M, Huang H, Ren G, Yan J. EEG signal varies with different outcomes  
718 in comatose patients: A quantitative method of electroencephalography reactivity. *Journal of Neuroscience*  
719 *Methods*. 2020; 342:108812.
- 720 **Ching S**, Brown EN. Modeling the dynamical effects of anesthesia on brain circuits. *Current opinion in neuro-*  
721 *biology*. 2014; 25:116–122.
- 722 **Colombo MA**, Napolitani M, Boly M, Gosseries O, Casarotto S, Rosanova M, Brichant JF, Boveroux P, Rex S,  
723 Laureys S, et al. The spectral exponent of the resting EEG indexes the presence of consciousness during  
724 unresponsiveness induced by propofol, xenon, and ketamine. *Neuroimage*. 2019; 189:631–644.
- 725 **Crone JS**, Lutkenhoff ES, Bio BJ, Laureys S, Monti MM. Testing proposed neuronal models of effective connec-  
726 tivity within the cortico-basal ganglia-thalamo-cortical loop during loss of consciousness. *Cerebral Cortex*.  
727 2017; 27(4):2727–2738.
- 728 **Crutchfield JP**, Young K. Computation at the onset of chaos. In: *The Santa Fe Institute, Westview Citeseer*; 1988.  
729 .
- 730 **Dafilis MP**, Liley DT, Cadusch PJ. Robust chaos in a model of the electroencephalogram: Implications for brain  
731 dynamics. *Chaos: An Interdisciplinary Journal of Nonlinear Science*. 2001; 11(3):474–478.
- 732 **Dawes J**, Freeland M. The ‘0–1 test for chaos’ and strange nonchaotic attractors. preprint. 2008; .
- 733 **Deransart C**, Riban V, Le BT, Marescaux C, Depaulis A. Dopamine in the striatum modulates seizures in a  
734 genetic model of absence epilepsy in the rat. *Neuroscience*. 2000; 100(2):335–344.
- 735 **DiCesare JA**, Malekmohammadi M, Sparks H, Toker D, Monti M, Hudson A, Pouratian N. Pallidocortical Connec-  
736 tivity Changes with Anesthetic Loss of Consciousness in Parkinson’s Disease Patients. *Neurosurgery*. 2020;  
737 67(Supplement\_1):nyaa447\_626.
- 738 **FitzGerald TH**, Valentin A, Selway R, Richardson MP. Cross-frequency coupling within and between the human  
739 thalamus and neocortex. *Frontiers in human neuroscience*. 2013; 7:84.
- 740 **Fontolan L**, Morillon B, Liegeois-Chauvel C, Giraud AL. The contribution of frequency-specific activity to hierar-  
741 chical information processing in the human auditory cortex. *Nature communications*. 2014; 5(1):1–10.
- 742 **Freeman WJ**. Simulation of chaotic EEG patterns with a dynamic model of the olfactory system. *Biological*  
743 *cybernetics*. 1987; 56(2):139–150.
- 744 **Frohlich J**, Toker D, Monti MM. Consciousness among delta waves: a paradox? *Brain*. 2021; .
- 745 **Glass L**, Mackey MC. From clocks to chaos. Princeton University Press; 1988.
- 746 **Gottwald GA**, Melbourne I. A new test for chaos in deterministic systems. In: *Proceedings of the Royal Society*  
747 *of London A: Mathematical, Physical and Engineering Sciences*, vol. 460 The Royal Society; 2004. p. 603–611.
- 748 **Gottwald GA**, Melbourne I. Testing for chaos in deterministic systems with noise. *Physica D: Nonlinear Phe-*  
749 *nomena*. 2005; 212(1-2):100–110.
- 750 **Gottwald GA**, Melbourne I. Comment on “Reliability of the 0-1 test for chaos”. *Physical Review E*. 2008;  
751 77(2):028201.
- 752 **Gottwald GA**, Melbourne I. On the implementation of the 0–1 test for chaos. *SIAM Journal on Applied Dynam-*  
753 *ical Systems*. 2009; 8(1):129–145.
- 754 **Halberstadt AL**, Koedood L, Powell SB, Geyer MA. Differential contributions of serotonin receptors to the  
755 behavioral effects of indoleamine hallucinogens in mice. *Journal of psychopharmacology*. 2011; 25(11):1548–  
756 1561.
- 757 **Harris FJ**. Multirate signal processing for communication systems. CRC Press; 2022.
- 758 **Hazrati LN**, et al. Projection from the external pallidum to the reticular thalamic nucleus in the squirrel monkey.  
759 *Brain research*. 1991; 550(1):142–146.
- 760 **Hindriks R**, van Putten MJ. Meanfield modeling of propofol-induced changes in spontaneous EEG rhythms.  
761 *Neuroimage*. 2012; 60(4):2323–2334.



- 762 **Hudetz AG**, Pillay S, Wang S, Lee H. Desflurane anesthesia alters cortical layer-specific hierarchical Interactions  
763 in rat cerebral cortex. *Anesthesiology*. 2020; 132(5):1080–1090.
- 764 **Hutt A**, Longtin A. Effects of the anesthetic agent propofol on neural populations. *Cognitive neurodynamics*.  
765 2010; 4(1):37–59.
- 766 **Hwang K**, Bertolero MA, Liu WB, D'esposito M. The human thalamus is an integrative hub for functional brain  
767 networks. *Journal of Neuroscience*. 2017; 37(23):5594–5607.
- 768 **Imas OA**, Ropella KM, Ward BD, Wood JD, Hudetz AG. Volatile anesthetics disrupt frontal-posterior recurrent  
769 information transfer at gamma frequencies in rat. *Neuroscience letters*. 2005; 387(3):145–150.
- 770 **Jarre G**, Altwegg-Boussac T, Williams MS, Studer F, Chipaux M, David O, Charpier S, Depaulis A, Mahon S, Guille-  
771 main I. Building up absence seizures in the somatosensory cortex: from network to cellular epileptogenic  
772 processes. *Cerebral cortex*. 2017; 27(9):4607–4623.
- 773 **Kita H**, Tokuno H, Nambu A. Monkey globus pallidus external segment neurons projecting to the neostriatum.  
774 *Neuroreport*. 1999; 10(7):1467–1472.
- 775 **Kitamura A**, Marszalec W, Yeh JZ, Narahashi T. Effects of halothane and propofol on excitatory and inhibitory  
776 synaptic transmission in rat cortical neurons. *Journal of Pharmacology and Experimental Therapeutics*. 2003;  
777 304(1):162–171.
- 778 **Knibbe CA**, Zuideveld KP, Aarts LP, Kuks PF, Danhof M. Allometric relationships between the pharmacokinetics  
779 of propofol in rats, children and adults. *British journal of clinical pharmacology*. 2005; 59(6):705–711.
- 780 **Koch C**, Massimini M, Boly M, Tononi G. Neural correlates of consciousness: progress and problems. *Nature*  
781 *Reviews Neuroscience*. 2016; 17(5):307–321.
- 782 **Kozachenko L**, Leonenko NN. Sample estimate of the entropy of a random vector. *Problemy Peredachi Infor-*  
783 *matsii*. 1987; 23(2):9–16.
- 784 **Kraskov A**, Stögbauer H, Grassberger P. Estimating mutual information. *Physical review E*. 2004; 69(6):066138.
- 785 **Ku SW**, Lee U, Noh GJ, Jun IG, Mashour GA. Preferential inhibition of frontal-to-parietal feedback connectivity  
786 is a neurophysiologic correlate of general anesthesia in surgical patients. *PLoS one*. 2011; 6(10):e25155.
- 787 **Kuo H**, Chang H. Ventral pallido-striatal pathway in the rat brain: a light and electron microscopic study. *Journal*  
788 *of Comparative Neurology*. 1992; 321(4):626–636.
- 789 **Lan G**, Tomczak JM, Roijers DM, Eiben A. Time efficiency in optimization with a bayesian-evolutionary algorithm.  
790 arXiv preprint arXiv:200504166. 2020; .
- 791 **Langton CG**. Computation at the edge of chaos: phase transitions and emergent computation. *Physica D:*  
792 *Nonlinear Phenomena*. 1990; 42(1-3):12–37.
- 793 **Lazarus M**, Huang ZL, Lu J, Urade Y, Chen JF. How do the basal ganglia regulate sleep-wake behavior? *Trends*  
794 *in neurosciences*. 2012; 35(12):723–732.
- 795 **Lee U**, Ku S, Noh G, Baek S, Choi B, Mashour GA. Disruption of frontal-parietal communication by ketamine,  
796 propofol, and sevoflurane. *Anesthesiology*. 2013; 118(6):1264–1275.
- 797 **Lemieux M**, Chen JY, Lonjers P, Bazhenov M, Timofeev I. The impact of cortical deafferentation on the neocor-  
798 tical slow oscillation. *Journal of Neuroscience*. 2014; 34(16):5689–5703.
- 799 **Lendner JD**, Helfrich RF, Mander BA, Romundstad L, Lin JJ, Walker MP, Larsson PG, Knight RT. An electrophysi-  
800 ological marker of arousal level in humans. *Elife*. 2020; 9.
- 801 **Lizier JT**. JIDT: An information-theoretic toolkit for studying the dynamics of complex systems. *Frontiers in*  
802 *Robotics and AI*. 2014; 1:11.
- 803 **Lutkenhoff ES**, Chiang J, Tshibanda L, Kamau E, Kirsch M, Pickard JD, Laureys S, Owen AM, Monti MM. Thala-  
804 mic and extrathalamic mechanisms of consciousness after severe brain injury. *Annals of neurology*. 2015;  
805 78(1):68–76.
- 806 **Lutkenhoff ES**, Johnson MA, Casarotto S, Massimini M, Monti MM. Subcortical atrophy correlates with the  
807 perturbational complexity index in patients with disorders of consciousness. *Brain Stimulation*. 2020;  
808 13(5):1426–1435.

- 809 **Mäki-Marttunen V**, Diez I, Cortes JM, Chialvo DR, Villarreal M. Disruption of transfer entropy and inter-  
810 hemispheric brain functional connectivity in patients with disorder of consciousness. *Frontiers in neuroin-*  
811 *formatics*. 2013; 7:24.
- 812 **Malekmohammadi M**, Elias WJ, Pouratian N. Human thalamus regulates cortical activity via spatially specific  
813 and structurally constrained phase-amplitude coupling. *Cerebral Cortex*. 2015; 25(6):1618–1628.
- 814 **Malekmohammadi M**, Price CM, Hudson AE, DiCesare JA, Pouratian N. Propofol-induced loss of consciousness  
815 is associated with a decrease in thalamocortical connectivity in humans. *Brain*. 2019; 142(8):2288–2302.
- 816 **Mateos D**, Guevara Erra R, Wennberg R, Perez Velazquez J. Measures of entropy and complexity in altered  
817 states of consciousness. *Cognitive neurodynamics*. 2018; 12(1):73–84.
- 818 **Mazzoni A**, Lindén H, Cuntz H, Lansner A, Panzeri S, Einevoll GT. Computing the local field potential (LFP) from  
819 integrate-and-fire network models. *PLoS computational biology*. 2015; 11(12):e1004584.
- 820 **Miyamoto H**, Tatsukawa T, Shimohata A, Yamagata T, Suzuki T, Amano K, Mazaki E, Raveau M, Ogiwara I, Oba-  
821 Asaka A, et al. Impaired cortico-striatal excitatory transmission triggers epilepsy. *Nature communications*.  
822 2019; 10(1):1–13.
- 823 **Monti MM**, Laureys S, Owen AM. The vegetative state. *Bmj*. 2010; 341.
- 824 **Müller EJ**, Munn B, Hearne LJ, Smith JB, Fulcher B, Arnatkevičiūtė A, Lurie DJ, Cocchi L, Shine JM. Core and  
825 matrix thalamic sub-populations relate to spatio-temporal cortical connectivity gradients. *NeuroImage*. 2020;  
826 222:117224.
- 827 **Noroobabae L**, Steyn-Ross D, Steyn-Ross ML, Sleigh JW. Analysis of the Hindriks and van Putten model for  
828 propofol anesthesia: Limitations and extensions. *NeuroImage*. 2021; 227:117633.
- 829 **Olavarria J**, Van Sluyters RC, Killackey HP. Evidence for the complementary organization of callosal and thala-  
830 mic connections within rat somatosensory cortex. *Brain research*. 1984; 291(2):364–368.
- 831 **Opri E**, Cernera S, Okun MS, Foote KD, Gunduz A. The functional role of thalamocortical coupling in the human  
832 motor network. *Journal of Neuroscience*. 2019; 39(41):8124–8134.
- 833 **Ovchinnikov IV**, Li W, Sun Y, Hudson AE, Meier K, Schwartz RN, Wang KL. Criticality or Supersymmetry Breaking?  
834 Symmetry. 2020; 12(5):805.
- 835 **O’Byrne J**, Jerbi K. How critical is brain criticality? *Trends in Neurosciences*. 2022; .
- 836 **Panzeri S**, Brunel N, Logothetis NK, Kayser C. Sensory neural codes using multiplexed temporal scales. *Trends*  
837 *in neurosciences*. 2010; 33(3):111–120.
- 838 **Petreaanu L**, Huber D, Sobczyk A, Svoboda K. Channelrhodopsin-2-assisted circuit mapping of long-range cal-  
839 losal projections. *Nature neuroscience*. 2007; 10(5):663–668.
- 840 **Pinzuti E**, Wollstadt P, Gutknecht A, Tüscher O, Wibral M. Measuring spectrally-resolved information transfer.  
841 *PLoS computational biology*. 2020; 16(12):e1008526.
- 842 **Qiu MH**, Vetrivelan R, Fuller PM, Lu J. Basal ganglia control of sleep–wake behavior and cortical activation.  
843 *European Journal of Neuroscience*. 2010; 31(3):499–507.
- 844 **Qiu MH**, Yao QL, Vetrivelan R, Chen MC, Lu J. Nigrostriatal dopamine acting on globus pallidus regulates sleep.  
845 *Cerebral cortex*. 2016; 26(4):1430–1439.
- 846 **Qiu M**, Chen MC, Wu J, Nelson D, Lu J. Deep brain stimulation in the globus pallidus externa promotes sleep.  
847 *Neuroscience*. 2016; 322:115–120.
- 848 **Rajakumar N**, Elisevich K, Flumerfelt B. The pallidostriatal projection in the rat: a recurrent inhibitory loop?  
849 *Brain research*. 1994; 651(1-2):332–336.
- 850 **Ray S**, Crone NE, Niebur E, Franaszczuk PJ, Hsiao SS. Neural correlates of high-gamma oscillations (60–200  
851 Hz) in macaque local field potentials and their potential implications in electrocorticography. *Journal of*  
852 *Neuroscience*. 2008; 28(45):11526–11536.
- 853 **Redinbaugh MJ**, Phillips JM, Kambi NA, Mohanta S, Andryk S, Dooley GL, Afrasiabi M, Raz A, Saalman YB.  
854 Thalamus modulates consciousness via layer-specific control of cortex. *Neuron*. 2020; 106(1):66–75.

- 855 **Reed SJ**, Plourde G. Attenuation of high-frequency (50-200 Hz) thalamocortical EEG rhythms by propofol in rats  
856 is more pronounced for the thalamus than for the cortex. *PLoS One*. 2015; 10(4):e0123287.
- 857 **Riga MS**, Lladó-Pelfort L, Artigas F, Celada P. The serotonin hallucinogen 5-MeO-DMT alters cortico-thalamic  
858 activity in freely moving mice: Regionally-selective involvement of 5-HT1A and 5-HT2A receptors. *Neurophar-*  
859 *macology*. 2018; 142:219–230.
- 860 **Saalmann YB**, Pinsk MA, Wang L, Li X, Kastner S. The pulvinar regulates information transmission between  
861 cortical areas based on attention demands. *Science*. 2012; 337(6095):753–756.
- 862 **Samarasinghe RA**, Miranda OA, Mitchell S, Ferando I, Watanabe M, Buth JE, Kurdian A, Golshani P, Plath K,  
863 Lowry WE, et al. Identification of neural oscillations and epileptiform changes in human brain organoids.  
864 *Biorxiv*. 2019; p. 820183.
- 865 **Sanjari N**, Shalhaf A, Shalhaf R, Sleight J. Assessment of Anesthesia Depth Using Effective Brain Connectivity  
866 Based on Transfer Entropy on EEG Signal. *Basic and Clinical Neuroscience*. 2021; 12(2):269.
- 867 **Sato F**, Lavallée P, Lévesque M, Parent A. Single-axon tracing study of neurons of the external segment of the  
868 globus pallidus in primate. *Journal of Comparative Neurology*. 2000; 417(1):17–31.
- 869 **Saunders A**, Oldenburg IA, Berezovskii VK, Johnson CA, Kingery ND, Elliott HL, Xie T, Gerfen CR, Sabatini BL. A  
870 direct GABAergic output from the basal ganglia to frontal cortex. *Nature*. 2015; 521(7550):85–89.
- 871 **Schroeder KE**, Irwin ZT, Gaidica M, Bentley JN, Patil PG, Mashour GA, Chestek CA. Disruption of corticocortical  
872 information transfer during ketamine anesthesia in the primate brain. *Neuroimage*. 2016; 134:459–465.
- 873 **Shen HW**, Jiang XL, Yu AM. Nonlinear pharmacokinetics of 5-methoxy-N, N-dimethyltryptamine in mice. *Drug*  
874 *Metabolism and Disposition*. 2011; 39(7):1227–1234.
- 875 **Sherman SM**. The thalamus is more than just a relay. *Current opinion in neurobiology*. 2007; 17(4):417–422.
- 876 **Sherman SM**. Thalamus plays a central role in ongoing cortical functioning. *Nature neuroscience*. 2016;  
877 19(4):533–541.
- 878 **Shine JM**. The thalamus integrates the macrosystems of the brain to facilitate complex, adaptive brain network  
879 dynamics. *Progress in Neurobiology*. 2021; 199:101951.
- 880 **Staines W**, Fibiger H. Collateral projections of neurons of the rat globus pallidus to the striatum and substantia  
881 nigra. *Experimental brain research*. 1984; 56(2):217–220.
- 882 **Staines WA**, Atmadja S, Fibiger H. Demonstration of a pallidostriatal pathway by retrograde transport of HRP-  
883 labeled lectin. *Brain research*. 1981; 206(2):446–450.
- 884 **Steriade M**, Domich L, Oakson G, Deschenes M. The deafferented reticular thalamic nucleus generates spindle  
885 rhythmicity. *Journal of neurophysiology*. 1987; 57(1):260–273.
- 886 **Steyn-Ross ML**, Steyn-Ross DA, Sleight JW. Interacting Turing-Hopf instabilities drive symmetry-breaking tran-  
887 sitions in a mean-field model of the cortex: a mechanism for the slow oscillation. *Physical Review X*. 2013;  
888 3(2):021005.
- 889 **Theyel BB**, Llano DA, Sherman SM. The corticothalamocortical circuit drives higher-order cortex in the mouse.  
890 *Nature neuroscience*. 2010; 13(1):84–88.
- 891 **Timofeev I**, Grenier F, Bazhenov M, Sejnowski T, Steriade M. Origin of slow cortical oscillations in deafferented  
892 cortical slabs. *Cerebral cortex*. 2000; 10(12):1185–1199.
- 893 **Toker D**, Pappas I, Lendner JD, Frohlich J, Mateos DM, Muthukumaraswamy S, Carhart-Harris R, Paff M, Vespa  
894 PM, Monti MM, et al. Consciousness is supported by near-critical slow cortical electrodynamics. *Proceedings*  
895 *of the National Academy of Sciences*. 2022; 119(7):e202445119.
- 896 **Toker D**, Sommer FT, D'Esposito M. A simple method for detecting chaos in nature. *Communications biology*.  
897 2020; 3(1):1–13.
- 898 **Tort AB**, Kramer MA, Thorn C, Gibson DJ, Kubota Y, Graybiel AM, Kopell NJ. Dynamic cross-frequency couplings  
899 of local field potential oscillations in rat striatum and hippocampus during performance of a T-maze task.  
900 *Proceedings of the National Academy of Sciences*. 2008; 105(51):20517–20522.

- 901 **Trujillo CA**, Gao R, Negraes PD, Gu J, Buchanan J, Preissl S, Wang A, Wu W, Haddad GG, Chaim IA, et al. Complex  
902 oscillatory waves emerging from cortical organoids model early human brain network development. *Cell*  
903 *stem cell*. 2019; 25(4):558–569.
- 904 **Vetrivelan R**, Qiu MH, Chang C, Lu J. Role of basal ganglia in sleep–wake regulation: neural circuitry and clinical  
905 significance. *Frontiers in neuroanatomy*. 2010; 4:145.
- 906 **Webber JBW**. A bi-symmetric log transformation for wide-range data. *Measurement Science and Technology*.  
907 2012; 24(2):027001.
- 908 **White NS**, Alkire MT. Impaired thalamocortical connectivity in humans during general-anesthetic-induced un-  
909 consciousness. *Neuroimage*. 2003; 19(2):402–411.
- 910 **Wibral M**, Pampu N, Priesemann V, Siebenhühner F, Seiwert H, Lindner M, Lizier JT, Vicente R. Measuring  
911 information-transfer delays. *PLoS one*. 2013; 8(2):e55809.
- 912 **Wilson DJ**. The harmonic mean p-value for combining dependent tests. *Proceedings of the National Academy*  
913 *of Sciences*. 2019; 116(4):1195–1200.
- 914 **Wise S**, Jones E. The organization and postnatal development of the commissural projection of the rat somatic  
915 sensory cortex. *Journal of Comparative Neurology*. 1976; 168(3):313–343.
- 916 **Wollstadt P**, Sellers KK, Rudelt L, Priesemann V, Hutt A, Fröhlich F, Wibral M. Breakdown of local information  
917 processing may underlie isoflurane anesthesia effects. *PLoS computational biology*. 2017; 13(6):e1005511.
- 918 **Zheng ZS**, Monti MM. Thalamic and extra-thalamic connections of the Globus Pallidus in the human brain: The  
919 ultradirect pathway. *bioRxiv*. 2019; p. 688283.
- 920 **Zheng ZS**, Reggente N, Lutkenhoff E, Owen AM, Monti MM. Disentangling disorders of consciousness: Insights  
921 from diffusion tensor imaging and machine learning. *Human brain mapping*. 2017; 38(1):431–443.
- 922 **Zimmern V**. Why brain criticality is clinically relevant: a scoping review. *Frontiers in neural circuits*. 2020; 14:54.

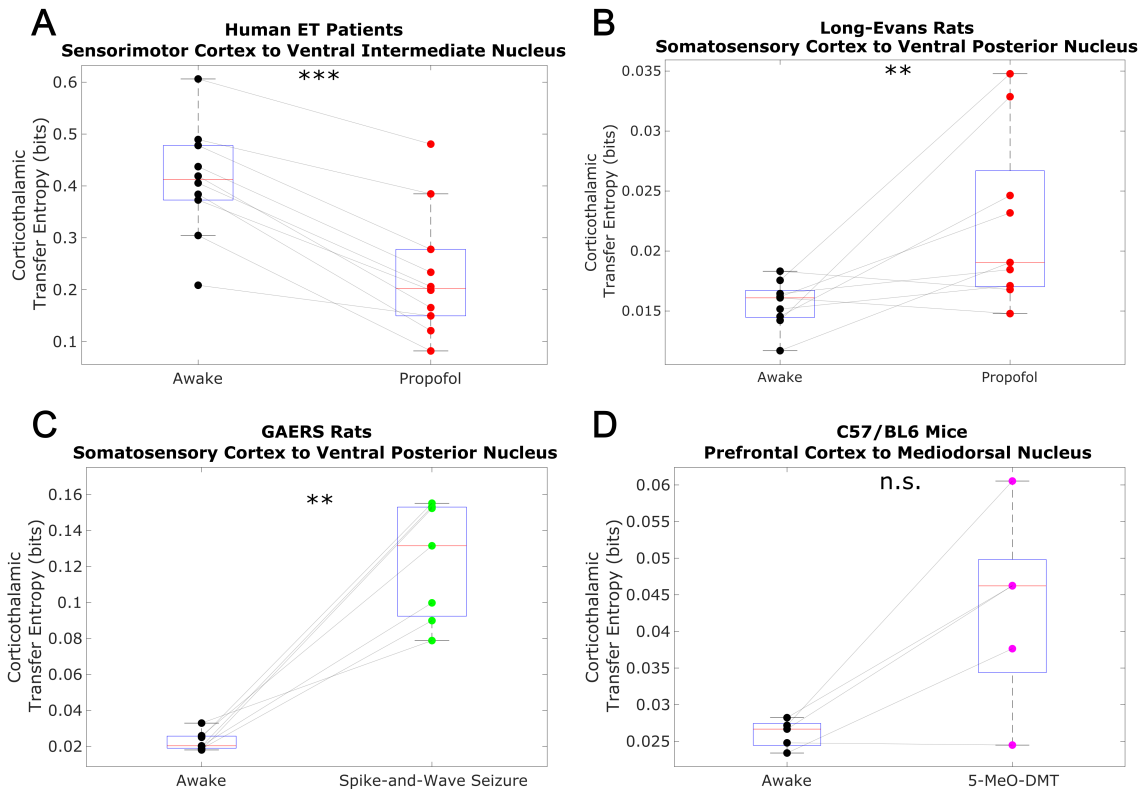

Fig. 3-figure supplement 1: We here plot changes to (non-spectrally resolved) transfer entropy from cortex to thalamus across brain states. As described in our methods, we used the Java Information Dynamics Toolkit (JIDT) to implement the method of Kraskov et al for model-free kernel estimation of probability distributions, which uses Kozachenko–Leonenko estimators of log-probabilities via nearest-neighbor counting, a fixed number  $K$  of nearest neighbors, and bias correction, with the embedded Schrieber history length  $k = 1$ . We also picked a time-lag for each individual time-series pair that maximized the estimated transfer entropy between those time-series. We found no consistent relationship between corticothalamic transfer entropy and consciousness.  $*$ = $p < 0.05$ ,  $**$ = $p < 0.01$ ,  $***$ = $p < 0.001$ , significance assessed using a one-tailed Wilcoxon signed-rank test.

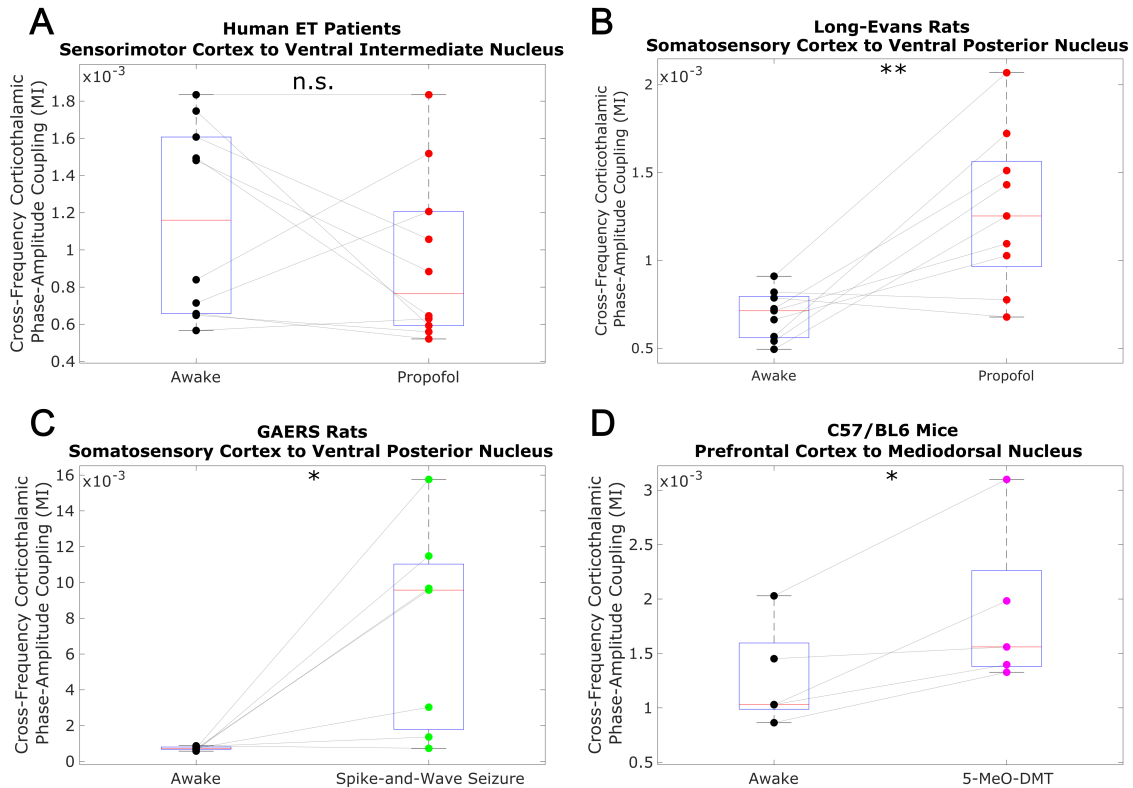

Fig. 3-figure supplement 2: We evaluated cross-frequency phase-amplitude coupling from cortex to thalamus using the modulation index (MI). Specifically, we evaluated coupling between the phase of the low-frequency (1.625-13 Hz) activity and the amplitude of high-frequency (52-104 Hz) activity (matching the frequency ranges analyzed in the main body of our paper). Note that the MI is a bivariate measure, meaning that it is calculated between pairs of univariate channels. As such, for our human ET patient data, which consisted of multiple cortical and thalamic channels, we calculated the MI from all cortical channels to all thalamic channels, and set the corticothalamic MI as the median across all resulting values. As was the case with transfer entropy, we found no consistent relationship between cross-frequency corticothalamic phase-amplitude coupling (across the frequencies studied in this paper) and consciousness.  $*$ = $p < 0.05$ ,  $**$ = $p < 0.01$ ,  $***$ = $p < 0.001$ , significance assessed using a one-tailed Wilcoxon signed-rank test.

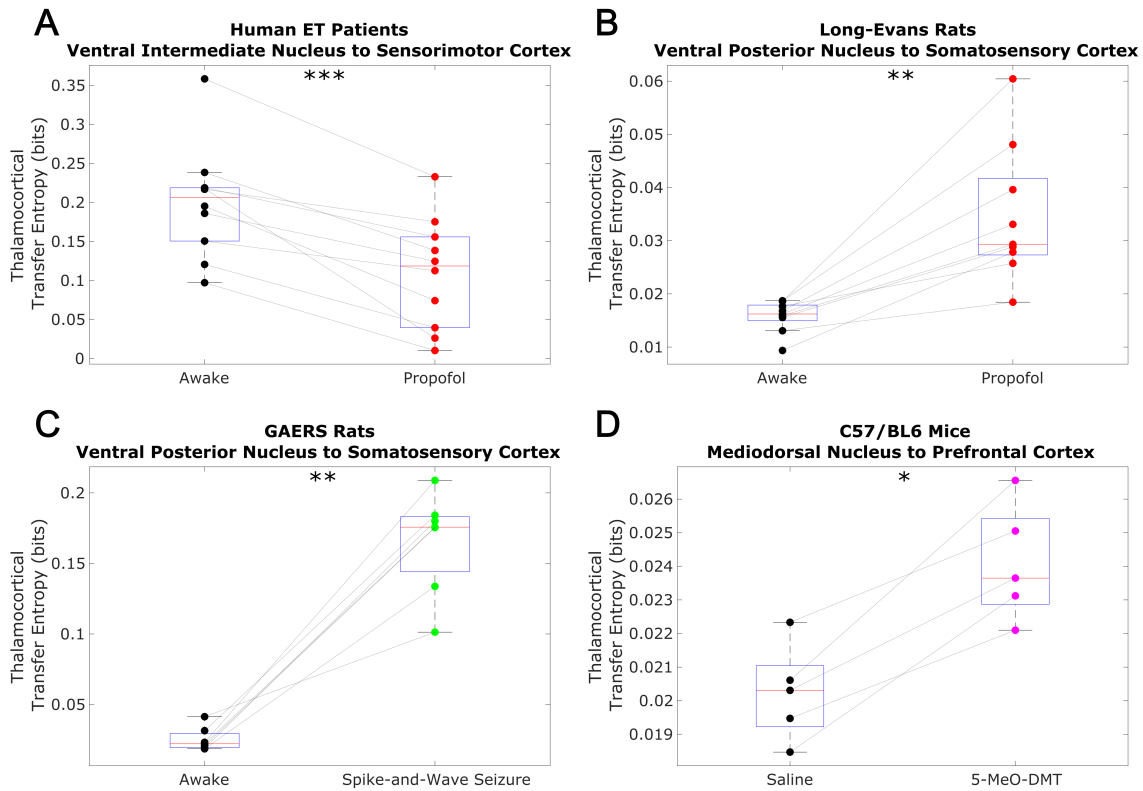

Fig. 5-figure supplement 1: We here plot changes to (non-spectrally resolved) transfer entropy from thalamus to cortex across brain states, calculated using the same methods described in Fig. 3-figure supplement 1. We again found no consistent relationship between thalamocortical transfer entropy and consciousness.  $*=p<0.05$ ,  $**p<0.01$ ,  $***p<0.001$ , significance assessed using a one-tailed Wilcoxon signed-rank test.

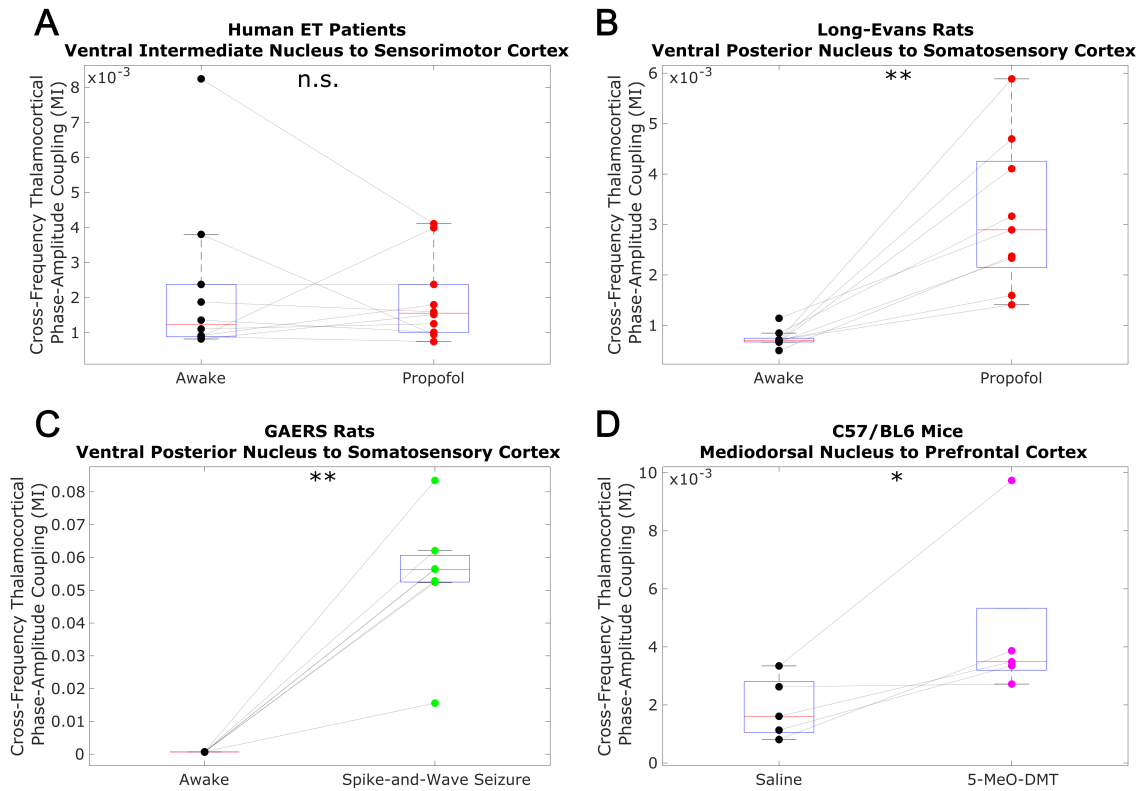

Fig. 5-figure supplement 2: We analyzed cross-frequency phase-amplitude coupling from thalamus to cortex using the same methods described in Fig. 1-figure supplement 2, and again observed no consistent relationship between cross-frequency thalamocortical phase-amplitude coupling and consciousness.  $*$ = $p < 0.05$ ,  $**$ = $p < 0.01$ ,  $***$ = $p < 0.001$ , significance assessed using a one-tailed Wilcoxon signed-rank test.



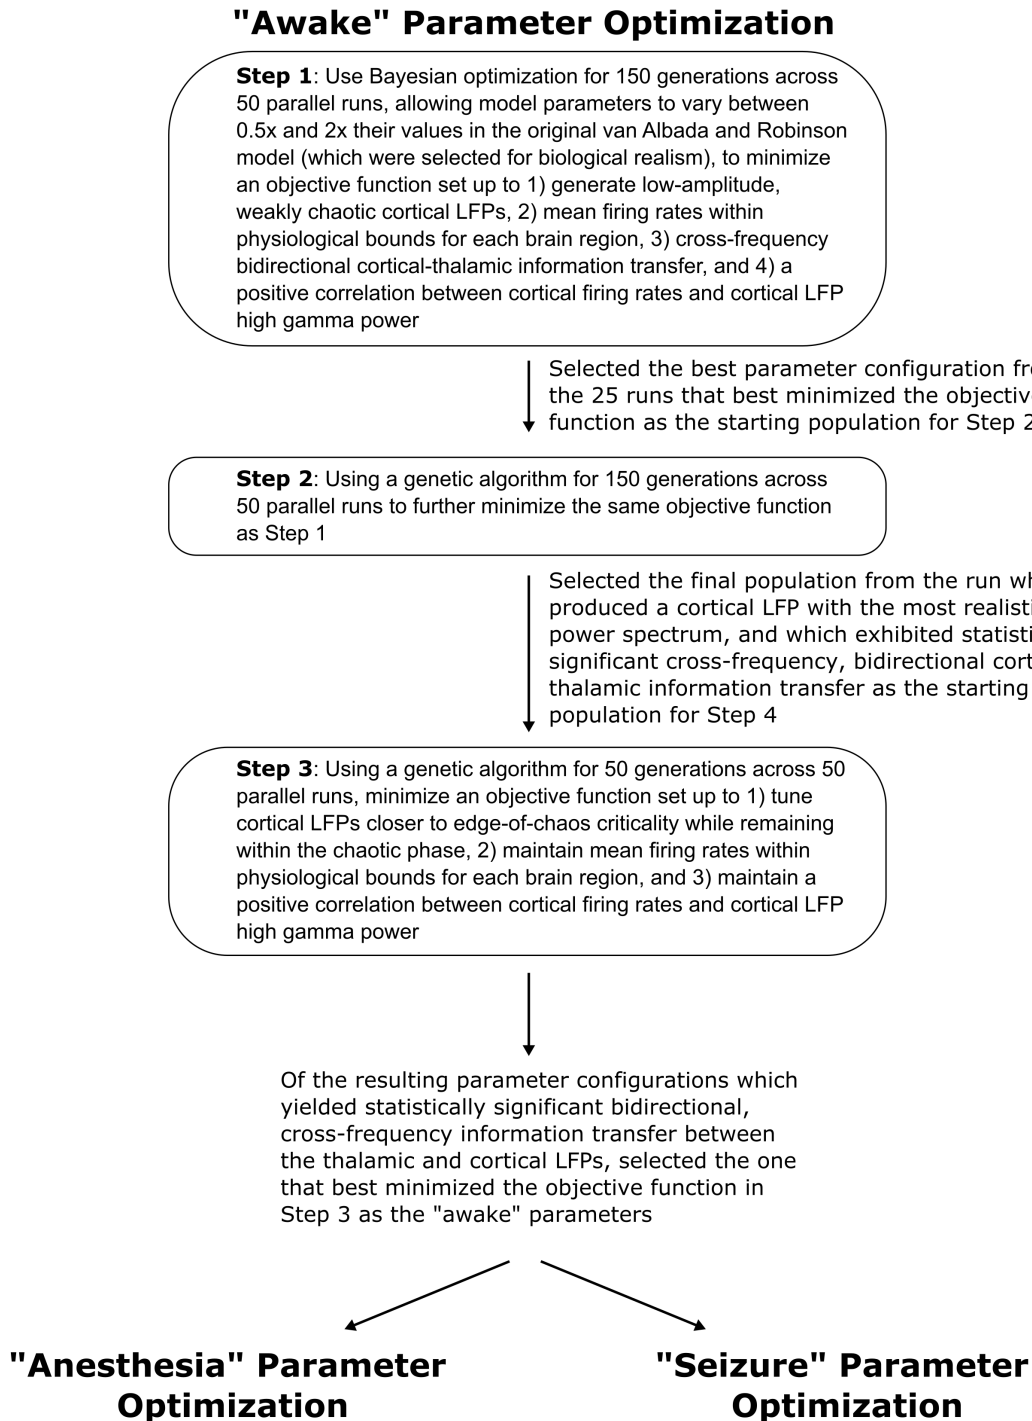

Fig. 6-figure supplement 1: We here depict the workflow for the use of Bayesian-genetic optimization to derive model parameters for the awake state of the mean-field model of the electrodynamics of the basal ganglia-thalamo-cortical system.

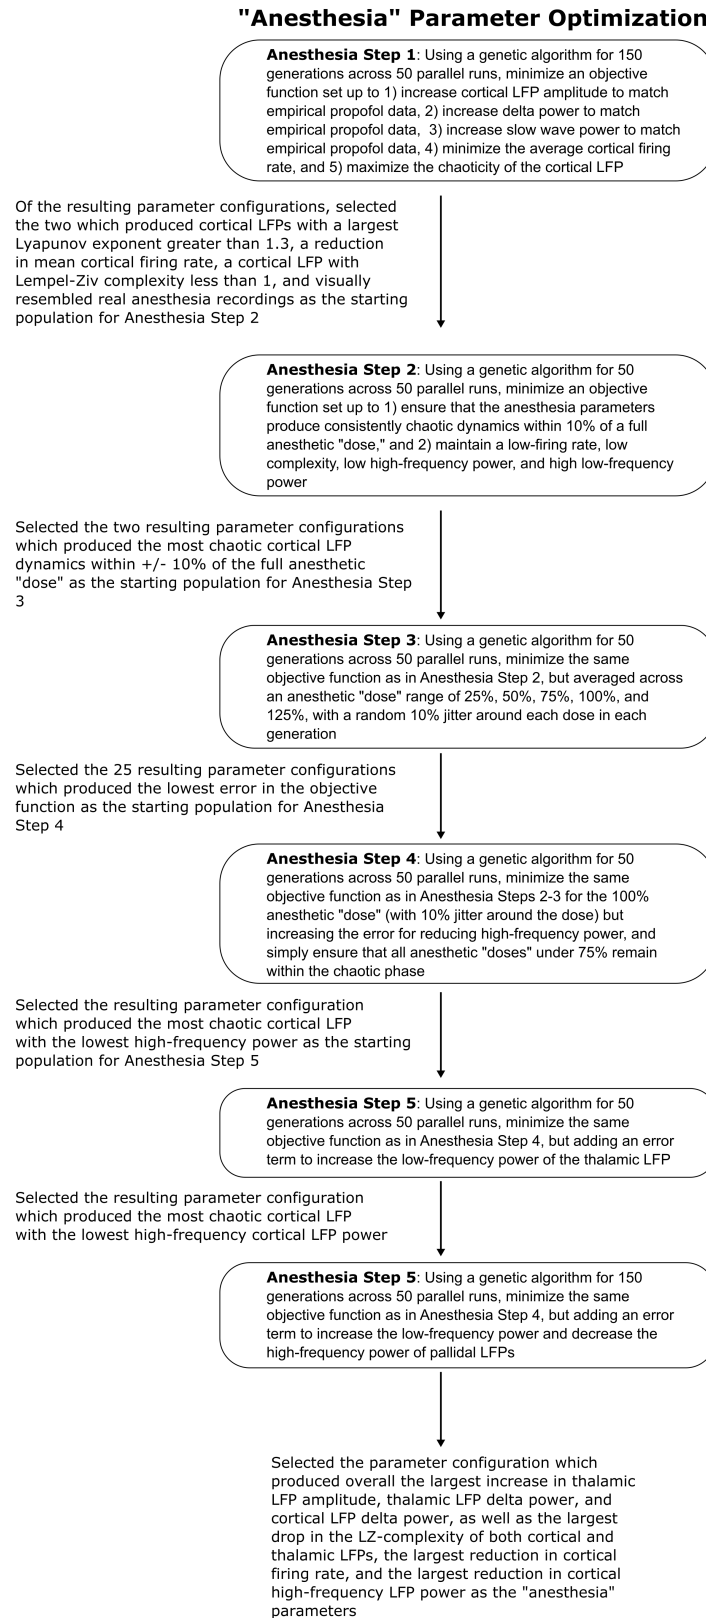

Fig. 6-figure supplement 2: We here depict the workflow for the use of genetic optimization to derive model parameters for the anesthesia state of the mean-field model, starting from the parameters for the wake state of the mean-field model.

## "Seizure" Parameter Optimization

**Seizure Step 1:** Using a genetic algorithm for 150 generations (or until error falls under 0.01) across 50 parallel runs, minimize an objective function set up to 1) minimize the largest Lyapunov exponent of the cortical LFP 2) minimize the Lempel-Ziv complexity of the cortical LFPs and 3) maximize the correlation between raw the cortical LFP and the cortical LFP bandpass filtered between 2 and 8 Hz (to ensure the cortical LFP is dominated by oscillations in this frequency range, which is typical for spike-and-wave seizures across mammalian species)

Of the resulting parameter configurations, selected one which produced a cortical LFP resembling a roughly 3-Hz spike-and-wave seizure

**Seizure Step 2:** Using a genetic algorithm for 50 generations across 50 parallel runs, minimize an objective function set up to 1) ensure that cortical LFP dynamics at 25%, 50%, and 75% of the full seizure "dose" (with 5% jitter around each "dose" in each run) do not produce stable fixed point dynamics, and 2) ensure that the 100% seizure "dose" produces a strongly periodic, low-complexity cortical LFP dominated by 2-8 Hz oscillations, and whose power spectrum maintains a minimal Euclidian distance from the power spectrum of the 3 Hz spike-and-wave cortical LFP generated by the parameter configuratoin selected in Seizure Step 1

Selected a paramater configuration which produced no stable fixed points for any seizure "dose," and which could produce both 3-4 spike-and-wave dynamics and 6-8 spike-and-wave dynamics as a function of "dose" as the "seizure" parameters

Fig. 6-figure supplement 3: We here show the workflow for the use of genetic optimization to derive model parameters for the generalized spike-and-wave seizure state of the mean-field model, starting from the parameters for the wake state of the model.

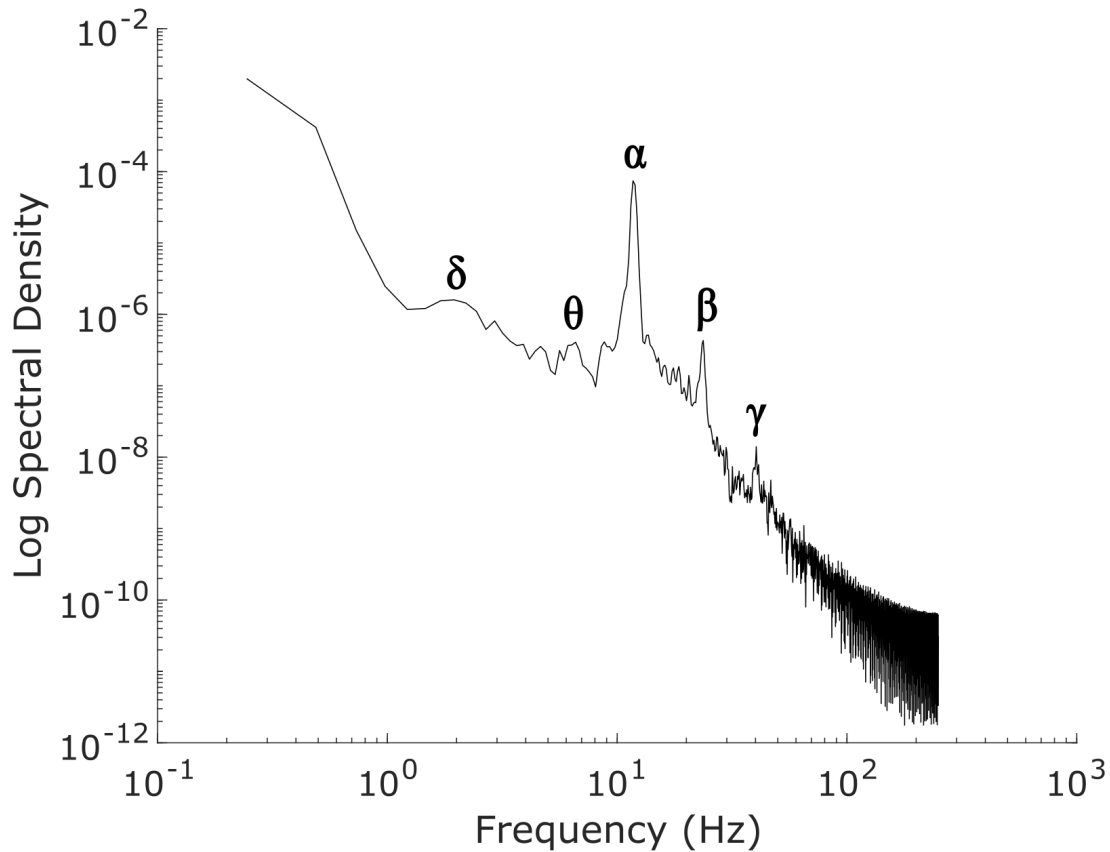

Fig. 7-figure supplement 1: The power spectrum of our simulated “awake” cortical local field potential (LFP), which was generated by optimizing the parameters of a mean-field model of the basal ganglia-thalamo-cortical system using machine learning (see Methods). Our simulated cortical LFP produces spectral peaks at frequencies precisely corresponding to canonical cortical electrodynamic oscillations, including  $\delta$  waves (1-4 Hz),  $\theta$  waves (4-8 Hz),  $\alpha$  waves (8-13 Hz),  $\beta$  waves (15-30 Hz), and low- $\gamma$  waves (35-60 Hz).

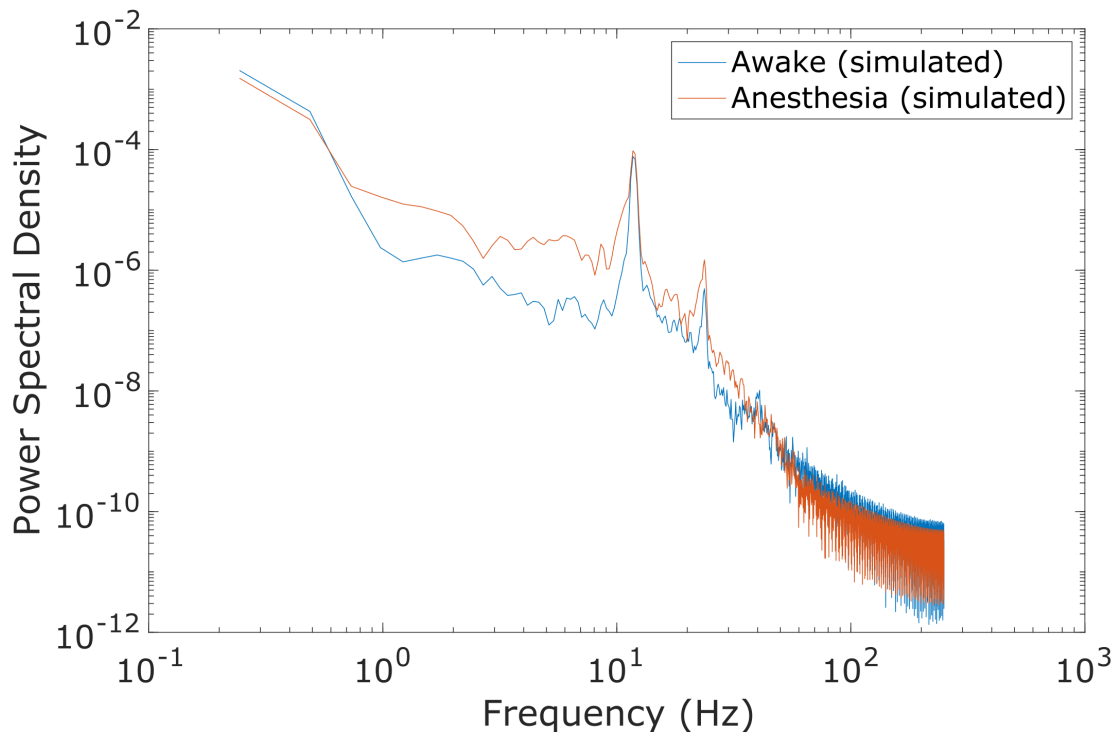

Fig. 7-figure supplement 2: Compared to the power spectrum of our simulated awake cortical LFP, the power spectrum of our simulated anesthesia LFP exhibited increased low-frequency power and decreased high-frequency power. Here, the anesthesia simulation corresponds to the 100% “dose,” which is the set of parameters arrived at through our genetic optimization.

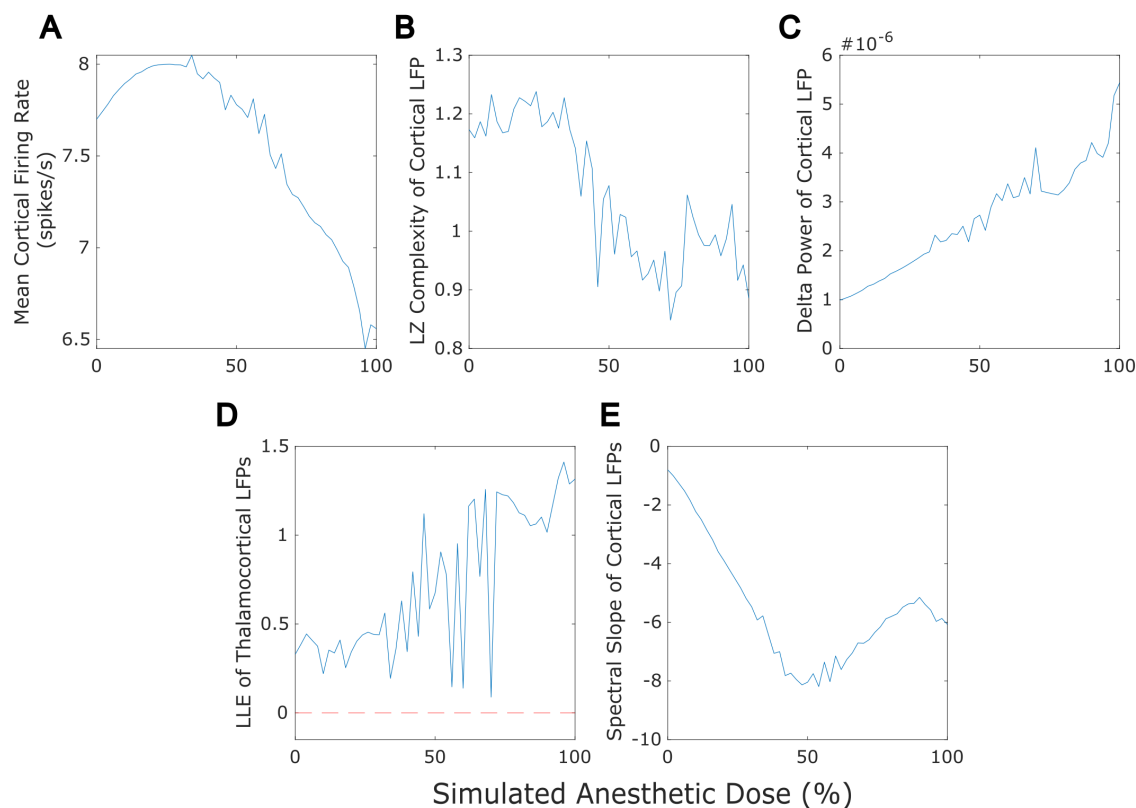

Fig. 7-figure supplement 3: Our mean-field model successfully recapitulated several previously established features of anesthesia, including a reduction in cortical firing rate (A), a loss of the information-richness of cortical LFPs as indexed by Lempel-Ziv complexity (B), a rise in the spectral power of delta (1-4 Hz) oscillations in cortical LFPs (C), strongly chaotic neural electro-dynamics (D - note that the dashed red line at LLE=0 corresponds to edge-of-chaos criticality), and a steepening spectral slope of cortical electro-dynamics (here measured by fitting a line to the log spectral density of the simulated cortical LFP between 30 and 45 Hz) (E). Note that we here plot only up to 100% anesthesia “dose,” which is the set of parameters arrived at through our genetic optimization. At higher “doses” (see Methods), dynamics switch to stochastic burst suppression followed by isoelectricity with a complete cessation of firing (see Figure 5 for example LFP traces from these higher-dose states).

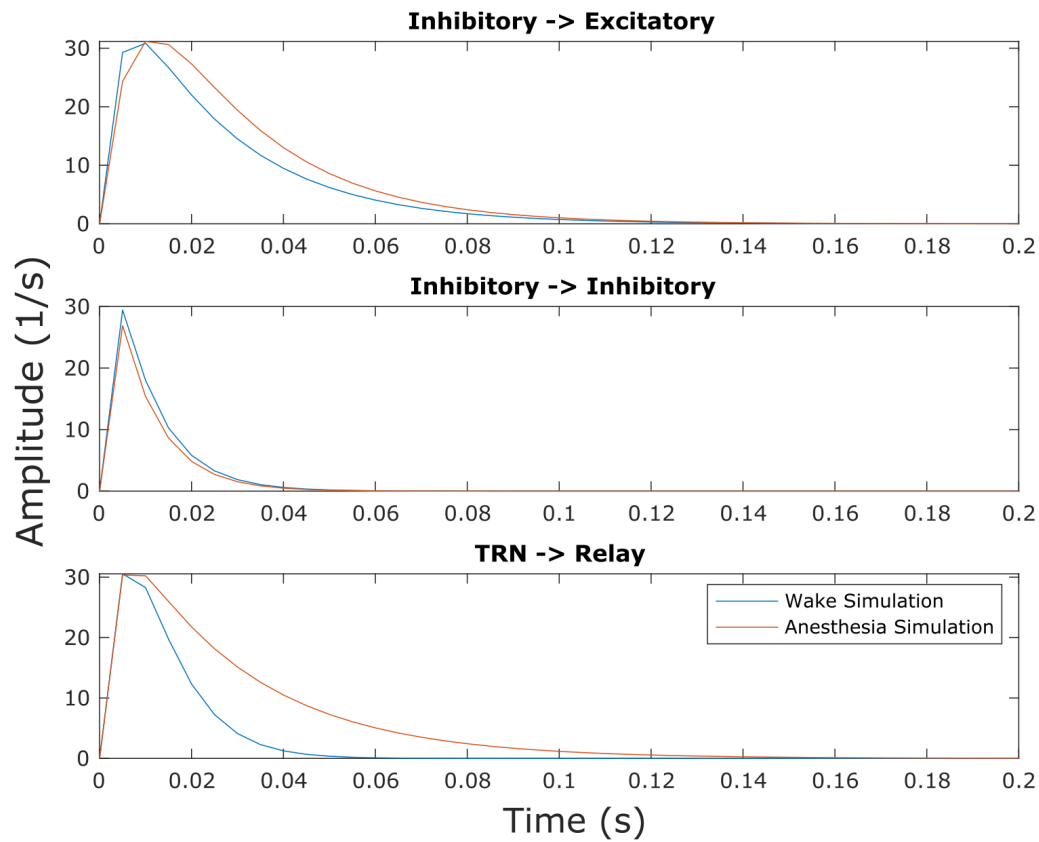

Fig. 7-figure supplement 4: Though this effect was not explicitly selected for in our parameter optimization, we found that our simulated anesthesia state resulted in prolonged inhibitory postsynaptic potentials (IPSPs) at excitatory cells in both the cortex and thalamic relay nucleus relative to the waking state of the model, owing to changes in synaptodendritic rise and decay rates (Tables S1, S3).

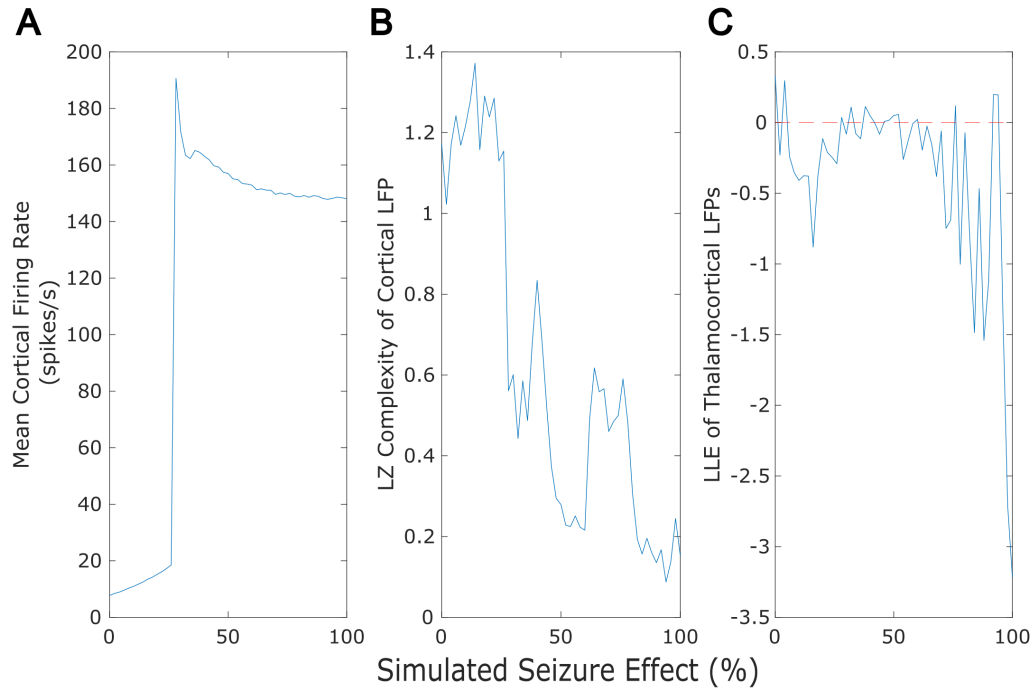

Fig. 7-figure supplement 5: Our mean-field model successfully recapitulated several previously established features of generalized seizures, including a large rise in cortical firing rate (A), a loss of the information-richness of cortical LFPs as indexed by Lempel-Ziv complexity (B), and strongly periodic neural electrodynamics (C - note that the dashed red line at LLE=0 corresponds to edge-of-chaos criticality).
